# Supplementary material
Source: Research Square preprint supplement (doi:10.21203/rs.3.rs-9970227/v1)
Supplement: Supplementary file 1 [file 3fdf6ece6fa1e0f0557216a0.pdf]

1

## 2 **Supplementary Information**

### 3 **The microscopic origin of a hesitant world: Quadrangular holes govern path multiplicity in** 4 **complex networks**

5 **Ye Deng<sup>1,2</sup>, Jun Wu<sup>1,2,\*</sup>, Xin Lu<sup>3\*</sup>, Petter Holme<sup>4,5\*</sup>, Daqing Li<sup>6,7\*</sup>, Zengru Di<sup>1,2,8</sup>, Guanrong Chen<sup>9</sup>, Jürgen Kurths<sup>10,11</sup>**

6 <sup>1</sup>Department of Systems Science, Faculty of Arts and Sciences, Beijing Normal University, Zhuhai 519087, China; <sup>2</sup>International Academic Center of Complex Systems, Beijing  
7 Normal University, Zhuhai 519087, China; <sup>3</sup>College of Systems Engineering, National University of Defense Technology, Changsha 410073, China; <sup>4</sup>Department of Computer  
8 Science, Aalto University, Espoo 02150, Finland; <sup>5</sup>Center for Computational Social Science, Kobe University, Kobe 657-8501, Japan; <sup>6</sup>School of Reliability and Systems  
9 Engineering, Beihang University, Beijing 100083, China; <sup>7</sup>Department of Science and Technology, Civil Aviation University of China, Tianjin 300300, China; <sup>8</sup>School of Systems  
10 Science, Beijing Normal University, Beijing 100875, China; <sup>9</sup>Department of Electrical Engineering, City University of Hong Kong, Hong Kong SAR, China; <sup>10</sup>Research Domain  
11 Complexity Science, Potsdam Institute for Climate Impact Research, Potsdam 14473, Germany; <sup>11</sup>Department of Physics, Humboldt-Universität zu Berlin, Berlin 12489,  
12 Germany

#### 13 **This PDF file includes:**

14 Tables S1 to S3

15 Figs. S1 to S24

**Table S1. Metadata of 140 real-world networks, where  $N$  is the number of nodes,  $n_c$  is the number of communities,  $\langle k \rangle$  is the average degree,  $L$  is the average shortest path length,  $E_{glob}$  is the global efficiency,  $D$  is the diameter,  $r$  is the assortativity coefficient,  $C$  is the clustering coefficient,  $k_s$  is the maximum k-core,  $|\mathcal{H}_3(G)|$  is the number of triangles,  $|\mathcal{H}_4(G)|$  is the number of chordless 4-cycles,  $|\mathcal{H}_5(G)|$  is the number of chordless 5-cycles, and  $|\mathcal{H}_6(G)|$  is the number of chordless 6-cycles. For each real network, we analyze the largest connected component to avoid artifacts from disconnected components.**

| No. | Name                                            | RPMI | PMI   | $n_c$ | $\langle k \rangle$ | $L$  | $E_{glob}$ | $D$ | $r$   | $C$  | $k_s$ | $ \mathcal{H}_3(G) $ | $ \mathcal{H}_4(G) $ | $ \mathcal{H}_5(G) $ | $ \mathcal{H}_6(G) $ |
|-----|-------------------------------------------------|------|-------|-------|---------------------|------|------------|-----|-------|------|-------|----------------------|----------------------|----------------------|----------------------|
| 1   | bn-cat-mixed-species-brain-1                    | 1.08 | 5.76  | 3     | 22.46               | 1.70 | 0.67       | 3   | -0.03 | 0.66 | 16    | 3613                 | 4568                 | 5077                 | 5101                 |
| 2   | bn-macaque-rhesus-brain-2                       | 0.98 | 4.04  | 2     | 12.79               | 1.87 | 0.57       | 3   | -0.77 | 0.86 | 11    | 1902                 | 1649                 | 87                   | 0                    |
| 3   | bn-macaque-rhesus-cerebral-cortex-1             | 1.12 | 8.07  | 3     | 30.79               | 1.66 | 0.67       | 3   | -0.55 | 0.74 | 22    | 10336                | 16425                | 10777                | 10522                |
| 4   | bn-macaque-rhesus-interareal-cortical-network-2 | 1.13 | 14.20 | 1     | 48.65               | 1.47 | 0.76       | 2   | -0.70 | 0.85 | 29    | 29638                | 0                    | 0                    | 0                    |
| 5   | bn-mouse-kasthuri-graph-v4                      | 7.91 | 13.20 | 21    | 3.11                | 4.91 | 0.23       | 12  | -0.24 | 0    | 3     | 0                    | 770                  | 0                    | 11547                |
| 6   | bn-mouse-brain-1                                | 0.89 | 27.96 | 2     | 151.07              | 1.29 | 0.86       | 2   | -0.07 | 0.76 | 111   | 622414               | 3051871              | 9377953              | 16227275             |
| 7   | bn-mouse-retina-1                               | 1.31 | 29.49 | 4     | 168.79              | 1.86 | 0.58       | 4   | -0.20 | 0.59 | 121   | 3289057              | 47425907             | 1286844748           | 31237454889          |
| 8   | bn-mouse-visual-cortex-1-2                      | 1.48 | 2.11  | 3     | 3.03                | 2.94 | 0.42       | 6   | -0.47 | 0.05 | 2     | 1                    | 13                   | 5                    | 27                   |
| 9   | aves-barn-swallow-contact-network               | 0.99 | 2.08  | 2     | 6.24                | 1.73 | 0.68       | 4   | -0.31 | 0.55 | 5     | 55                   | 51                   | 1                    | 3                    |
| 10  | aves-barn-swallow-non-physical                  | 0.85 | 1.85  | 2     | 14.35               | 1.10 | 0.95       | 2   | -0.15 | 0.93 | 13    | 510                  | 3                    | 0                    | 0                    |
| 11  | aves-sparrow-social                             | 1.14 | 4.79  | 4     | 17.46               | 1.75 | 0.66       | 3   | -0.06 | 0.72 | 13    | 1857                 | 906                  | 1013                 | 1231                 |
| 12  | aves-sparrow-social-2009                        | 0.90 | 3.24  | 3     | 13.61               | 1.89 | 0.68       | 4   | 0.29  | 0.77 | 12    | 721                  | 397                  | 215                  | 26                   |
| 13  | aves-sparrow-social-2010                        | 0.98 | 3.96  | 4     | 15.25               | 1.65 | 0.69       | 3   | -0.12 | 0.71 | 11    | 1045                 | 449                  | 503                  | 393                  |
| 14  | aves-sparrowlyon-flock-season2                  | 0.99 | 2.58  | 3     | 6.98                | 2.02 | 0.55       | 3   | -0.63 | 0.67 | 8     | 248                  | 81                   | 0                    | 0                    |

*Continued on next page*

| <i>No.</i> | <i>Name</i>                    | <i>RPMI</i> | <i>PMI</i> | $n_c$ | $\langle k \rangle$ | $L$   | $E_{glob}$ | $D$ | $r$   | $C$  | $k_s$ | $ \mathcal{H}_3(G) $ | $ \mathcal{H}_4(G) $ | $ \mathcal{H}_5(G) $ | $ \mathcal{H}_6(G) $ |
|------------|--------------------------------|-------------|------------|-------|---------------------|-------|------------|-----|-------|------|-------|----------------------|----------------------|----------------------|----------------------|
| 15         | aves-sparrowlyon-flock-season3 | 1.03        | 3.44       | 2     | 12.07               | 1.61  | 0.72       | 3   | 0.07  | 0.74 | 10    | 472                  | 42                   | 121                  | 84                   |
| 16         | aves-thornbill-farine          | 0.94        | 3.23       | 3     | 10.16               | 1.85  | 0.58       | 3   | -0.75 | 0.87 | 8     | 751                  | 415                  | 0                    | 0                    |
| 17         | bio-CE-GT                      | 2.53        | 7.72       | 22    | 7.25                | 3.73  | 0.30       | 10  | -0.19 | 0.59 | 9     | 3959                 | 11705                | 16844                | 80438                |
| 18         | bio-CE-LC                      | 3.50        | 4.79       | 91    | 2.62                | 7.92  | 0.15       | 22  | -0.26 | 0.08 | 4     | 148                  | 471                  | 35                   | 357                  |
| 19         | bio-CE-PG                      | 0.60        | 1.58       | 3     | 5.67                | 2.09  | 0.49       | 3   | -0.55 | 0.49 | 9     | 4410                 | 0                    | 0                    | 0                    |
| 20         | bio-DM-HT                      | 6.30        | 10.85      | 243   | 3.22                | 8.14  | 0.13       | 19  | -0.10 | 0.01 | 11    | 118                  | 12683                | 41                   | 122                  |
| 21         | bio-DM-LC                      | 21.20       | 44.67      | 34    | 4.13                | 6.61  | 0.19       | 18  | -0.19 | 0.12 | 10    | 194                  | 9642                 | 142                  | 5717                 |
| 22         | bio-DR-CX                      | 1.49        | 27.72      | 4     | 51.68               | 2.78  | 0.39       | 7   | 0.34  | 0.20 | 95    | 1026290              | 12091300             | 434866528            | 10500747650          |
| 23         | bio-HS-HT                      | 3.47        | 13.72      | 50    | 10.92               | 4.06  | 0.27       | 12  | 0.29  | 0.17 | 39    | 48888                | 194960               | 625794               | 6824137              |
| 24         | bio-SC-LC                      | 4.32        | 21.50      | 15    | 20.46               | 3.24  | 0.33       | 7   | 0.19  | 0.17 | 48    | 75957                | 1375383              | 4990829              | 97394501             |
| 25         | bio-SC-TS                      | 1.05        | 4.52       | 2     | 12.93               | 1.88  | 0.56       | 3   | -0.88 | 0.90 | 9     | 2144                 | 0                    | 0                    | 0                    |
| 26         | bio-celegans                   | 1.37        | 4.92       | 8     | 8.94                | 2.66  | 0.41       | 7   | -0.23 | 0.65 | 10    | 3284                 | 4493                 | 11720                | 45296                |
| 27         | bio-celegans-dir               | 1.37        | 4.92       | 8     | 8.94                | 2.66  | 0.41       | 7   | -0.23 | 0.65 | 10    | 3284                 | 4493                 | 11720                | 45296                |
| 28         | bio-grid-mouse                 | 6.65        | 9.78       | 66    | 2.78                | 8.66  | 0.15       | 30  | -0.21 | 0.05 | 6     | 105                  | 3099                 | 23                   | 17328                |
| 29         | bio-grid-plant                 | 3.77        | 8.22       | 137   | 4.29                | 8.29  | 0.15       | 26  | 0.00  | 0.17 | 12    | 2477                 | 7149                 | 2787                 | 4914                 |
| 30         | bio-grid-worm                  | 3.27        | 6.58       | 36    | 3.85                | 4.32  | 0.25       | 13  | -0.17 | 0.05 | 10    | 2090                 | 32679                | 42919                | 406191               |
| 31         | bio-yeast                      | 1.83        | 2.58       | 152   | 2.67                | 6.81  | 0.16       | 19  | -0.21 | 0.07 | 5     | 206                  | 139                  | 113                  | 258                  |
| 32         | bio-yeast-protein-inter        | 1.84        | 2.58       | 152   | 2.67                | 6.81  | 0.16       | 19  | -0.21 | 0.07 | 5     | 206                  | 139                  | 113                  | 258                  |
| 33         | ca-AstroPh                     | 3.43        | 25.18      | 611   | 22.00               | 4.19  | 0.26       | 14  | 0.20  | 0.63 | 56    | 1350014              | 1302079              | 33997621             | 1054735601           |
| 34         | ca-CSphd                       | 1.58        | 1.53       | 138   | 2.04                | 11.75 | 0.11       | 28  | -0.25 | 0.00 | 2     | 4                    | 5                    | 0                    | 1                    |
| 35         | ca-CondMat                     | 3.37        | 11.84      | 979   | 8.55                | 5.35  | 0.20       | 15  | 0.13  | 0.64 | 25    | 171051               | 37757                | 365462               | 4458410              |
| 36         | ca-Erdos992                    | 2.87        | 4.56       | 430   | 2.98                | 5.51  | 0.19       | 14  | -0.45 | 0.08 | 7     | 1610                 | 1895                 | 5914                 | 27224                |
| 37         | ca-GrQc                        | 1.87        | 5.40       | 494   | 6.46                | 6.05  | 0.18       | 17  | 0.64  | 0.56 | 43    | 47779                | 1115                 | 3358                 | 12502                |
| 38         | ca-HepPh                       | 2.81        | 21.83      | 206   | 21.00               | 4.67  | 0.23       | 13  | 0.63  | 0.62 | 238   | 3357890              | 820741               | 13431707             | 218007076            |
| 39         | eco-everglades                 | 1.14        | 7.03       | 3     | 25.51               | 1.64  | 0.69       | 3   | -0.30 | 0.55 | 20    | 4348                 | 20426                | 8985                 | 10443                |
| 40         | eco-foodweb-baydry             | 1.43        | 9.37       | 4     | 32.91               | 1.77  | 0.62       | 3   | -0.10 | 0.33 | 24    | 8715                 | 139200               | 366032               | 1753157              |
| 41         | eco-foodweb-baywet             | 1.41        | 9.17       | 4     | 32.42               | 1.78  | 0.62       | 3   | -0.11 | 0.33 | 23    | 8437                 | 131661               | 350309               | 1686287              |
| 42         | eco-mangwet                    | 1.07        | 7.07       | 3     | 29.81               | 1.69  | 0.65       | 3   | -0.15 | 0.47 | 23    | 7494                 | 58777                | 69466                | 159659               |

*Continued on next page*

| <i>No.</i> | <i>Name</i>                     | <i>RPMI</i> | <i>PMI</i> | $n_c$ | $\langle k \rangle$ | $L$   | $E_{glob}$ | $D$ | $r$   | $C$  | $k_s$ | $ \mathcal{H}_3(G) $ | $ \mathcal{H}_4(G) $ | $ \mathcal{H}_5(G) $ | $ \mathcal{H}_6(G) $ |
|------------|---------------------------------|-------------|------------|-------|---------------------|-------|------------|-----|-------|------|-------|----------------------|----------------------|----------------------|----------------------|
| 43         | eco-stmarks                     | 0.91        | 3.12       | 4     | 12.96               | 1.76  | 0.62       | 3   | -0.23 | 0.41 | 10    | 650                  | 2542                 | 2844                 | 4776                 |
| 44         | ENZYMES-g118                    | 1.80        | 2.27       | 11    | 2.55                | 7.57  | 0.19       | 18  | 0.10  | 0    | 2     | 0                    | 12                   | 2                    | 8                    |
| 45         | ENZYMES-g196                    | 1.06        | 1.83       | 6     | 3.44                | 4.12  | 0.32       | 10  | -0.06 | 0.21 | 3     | 17                   | 10                   | 5                    | 10                   |
| 46         | ENZYMES-g198                    | 1.15        | 1.65       | 6     | 2.80                | 5.15  | 0.27       | 13  | 0.06  | 0.19 | 2     | 9                    | 5                    | 3                    | 8                    |
| 47         | ENZYMES-g203                    | 1.31        | 2.33       | 5     | 3.57                | 4.74  | 0.29       | 11  | 0.22  | 0.28 | 3     | 31                   | 19                   | 6                    | 3                    |
| 48         | ENZYMES-g209                    | 1.35        | 2.29       | 6     | 3.54                | 4.80  | 0.29       | 11  | 0.23  | 0.28 | 3     | 31                   | 19                   | 3                    | 5                    |
| 49         | ENZYMES-g349                    | 1.49        | 2.64       | 7     | 3.69                | 5.35  | 0.28       | 12  | -0.23 | 0.24 | 3     | 26                   | 20                   | 20                   | 34                   |
| 50         | ENZYMES-g465                    | 1.43        | 2.62       | 7     | 3.81                | 4.43  | 0.31       | 9   | 0.01  | 0.25 | 3     | 23                   | 22                   | 17                   | 15                   |
| 51         | ENZYMES-g484                    | 1.48        | 2.02       | 5     | 2.67                | 6.01  | 0.24       | 13  | 0.06  | 0.15 | 2     | 7                    | 7                    | 3                    | 3                    |
| 52         | ENZYMES-g501                    | 1.45        | 1.67       | 8     | 2.42                | 7.14  | 0.21       | 18  | 0.49  | 0.01 | 3     | 2                    | 20                   | 2                    | 13                   |
| 53         | ENZYMES-g532                    | 1.47        | 2.27       | 7     | 3.24                | 4.75  | 0.28       | 12  | 0.20  | 0.09 | 3     | 16                   | 29                   | 19                   | 8                    |
| 54         | ENZYMES-g541                    | 1.40        | 1.78       | 6     | 2.64                | 3.80  | 0.35       | 8   | -0.07 | 0.06 | 2     | 2                    | 8                    | 0                    | 1                    |
| 55         | econ-mahindas                   | 6.53        | 30.46      | 10    | 11.94               | 3.57  | 0.31       | 8   | -0.06 | 0.06 | 40    | 3414                 | 1339064              | 61294                | 4128399              |
| 56         | econ-poli                       | 4.28        | 4.85       | 216   | 2.28                | 10.20 | 0.12       | 27  | -0.34 | 0.07 | 5     | 173                  | 325                  | 50                   | 26                   |
| 57         | econ-wm3                        | 1.58        | 10.22      | 5     | 18.51               | 2.61  | 0.44       | 6   | -0.06 | 0.27 | 33    | 21697                | 30164                | 21562                | 107057               |
| 58         | ia-email-univ                   | 1.75        | 6.74       | 14    | 9.62                | 3.61  | 0.30       | 8   | 0.08  | 0.22 | 11    | 5343                 | 12628                | 76309                | 598387               |
| 59         | ia-hospital-ward-proximity      | 0.96        | 7.33       | 3     | 30.37               | 1.60  | 0.70       | 3   | -0.18 | 0.64 | 22    | 8215                 | 12668                | 18992                | 23780                |
| 60         | ia-hospital-ward-proximity-attr | 0.96        | 7.33       | 3     | 30.37               | 1.60  | 0.70       | 3   | -0.18 | 0.64 | 22    | 8215                 | 12668                | 18992                | 23780                |
| 61         | ia-infect-hyper                 | 0.95        | 8.69       | 4     | 38.87               | 1.66  | 0.67       | 3   | -0.12 | 0.53 | 28    | 16867                | 69350                | 278748               | 898126               |
| 62         | ia-reality                      | 4.44        | 5.06       | 337   | 2.26                | 4.21  | 0.25       | 8   | -0.68 | 0.02 | 5     | 400                  | 2770                 | 4082                 | 45531                |
| 63         | ia-southernwomen                | 0.87        | 1.96       | 2     | 7.11                | 1.62  | 0.70       | 3   | -0.36 | 0.76 | 6     | 97                   | 25                   | 0                    | 0                    |
| 64         | ia-workplace-contacts           | 1.28        | 5.05       | 4     | 16.41               | 1.96  | 0.57       | 3   | -0.06 | 0.43 | 11    | 1752                 | 3997                 | 17575                | 74522                |
| 65         | power-1138-bus                  | 2.18        | 2.94       | 56    | 2.56                | 12.72 | 0.10       | 31  | -0.08 | 0.09 | 4     | 128                  | 78                   | 53                   | 51                   |
| 66         | power-494-bus                   | 1.89        | 2.29       | 29    | 2.37                | 10.47 | 0.12       | 26  | -0.07 | 0.04 | 2     | 21                   | 21                   | 10                   | 6                    |
| 67         | power-662-bus                   | 1.69        | 2.45       | 27    | 2.74                | 10.24 | 0.12       | 25  | -0.07 | 0.05 | 4     | 59                   | 55                   | 35                   | 39                   |
| 68         | power-685-bus                   | 3.73        | 7.29       | 17    | 3.74                | 12.42 | 0.11       | 26  | 0.18  | 0.17 | 5     | 330                  | 192                  | 207                  | 223                  |
| 69         | power-US-Grid                   | 5.00        | 6.99       | 141   | 2.67                | 18.99 | 0.06       | 46  | 0.00  | 0.08 | 5     | 651                  | 324                  | 311                  | 331                  |

*Continued on next page*

| <i>No.</i> | <i>Name</i>              | <i>RPMI</i> | <i>PMI</i> | $n_c$ | $\langle k \rangle$ | $L$   | $E_{glob}$ | $D$ | $r$   | $C$  | $k_s$ | $ \mathcal{H}_3(G) $ | $ \mathcal{H}_4(G) $ | $ \mathcal{H}_5(G) $ | $ \mathcal{H}_6(G) $ |
|------------|--------------------------|-------------|------------|-------|---------------------|-------|------------|-----|-------|------|-------|----------------------|----------------------|----------------------|----------------------|
| 70         | power-bcspwr09           | 3.10        | 4.57       | 76    | 2.78                | 15.49 | 0.08       | 37  | -0.10 | 0.08 | 3     | 174                  | 159                  | 191                  | 202                  |
| 71         | power-bcspwr10           | 3.90        | 6.54       | 100   | 3.12                | 20.85 | 0.06       | 49  | -0.05 | 0.09 | 4     | 721                  | 700                  | 657                  | 856                  |
| 72         | copresence-InVS13        | 0.66        | 6.28       | 2     | 82.42               | 1.12  | 0.94       | 2   | -0.03 | 0.93 | 78    | 101236               | 13423                | 4047                 | 453                  |
| 73         | hospital-ward-proximity  | 0.96        | 7.33       | 3     | 30.37               | 1.60  | 0.70       | 3   | -0.18 | 0.64 | 22    | 8215                 | 12668                | 18992                | 23780                |
| 74         | infect-hyper             | 0.96        | 8.69       | 4     | 38.87               | 1.66  | 0.67       | 3   | -0.12 | 0.53 | 28    | 16867                | 69350                | 278748               | 898126               |
| 75         | primary-school-proximity | 1.10        | 15.69      | 4     | 68.74               | 1.73  | 0.64       | 3   | 0.12  | 0.53 | 47    | 103760               | 760419               | 8321360              | 79399826             |
| 76         | road-City-of-Oldenburg   | 2.15        | 2.49       | 120   | 2.30                | 40.69 | 0.03       | 104 | 0.06  | 0.01 | 2     | 41                   | 124                  | 72                   | 101                  |
| 77         | road-beijing             | 12.79       | 18.61      | 101   | 2.73                | 36.92 | 0.03       | 89  | 0.27  | 0.02 | 2     | 153                  | 780                  | 187                  | 154                  |
| 78         | road-chesapeake          | 0.94        | 2.72       | 3     | 8.72                | 1.84  | 0.60       | 3   | -0.38 | 0.45 | 6     | 194                  | 839                  | 228                  | 116                  |
| 79         | road-euroroad            | 2.33        | 3.04       | 25    | 2.51                | 18.40 | 0.08       | 62  | 0.09  | 0.02 | 2     | 32                   | 38                   | 52                   | 43                   |
| 80         | road-minnesota           | 7.30        | 9.57       | 40    | 2.50                | 35.35 | 0.04       | 99  | -0.19 | 0.02 | 2     | 53                   | 54                   | 47                   | 52                   |
| 81         | tech-routers-rf          | 2.39        | 6.78       | 135   | 6.28                | 4.61  | 0.24       | 12  | 0.02  | 0.25 | 15    | 10404                | 22816                | 22762                | 142077               |
| 82         | email-dnc                | 2.58        | 6.09       | 18    | 4.76                | 3.37  | 0.32       | 8   | -0.31 | 0.22 | 17    | 9431                 | 16208                | 43358                | 153478               |
| 83         | email-univ               | 1.77        | 6.74       | 14    | 9.62                | 3.61  | 0.30       | 8   | 0.08  | 0.22 | 11    | 5343                 | 12628                | 76309                | 598387               |
| 84         | inf-USAir97              | 1.31        | 5.58       | 4     | 12.81               | 2.74  | 0.41       | 6   | -0.21 | 0.63 | 26    | 12181                | 4533                 | 4110                 | 5048                 |
| 85         | inf-euroroad             | 2.37        | 3.04       | 25    | 2.51                | 18.40 | 0.08       | 62  | 0.09  | 0.02 | 2     | 32                   | 38                   | 52                   | 43                   |
| 86         | inf-openflights          | 5.65        | 21.82      | 29    | 10.77               | 4.10  | 0.27       | 14  | 0.05  | 0.46 | 28    | 72843                | 319407               | 1632910              | 11884654             |
| 87         | inf-power                | 5.00        | 6.99       | 141   | 2.67                | 18.99 | 0.06       | 46  | 0.00  | 0.08 | 5     | 651                  | 324                  | 311                  | 331                  |
| 88         | london-overground        | 1.52        | 1.78       | 21    | 2.33                | 13.73 | 0.10       | 39  | 0.14  | 0.03 | 2     | 13                   | 12                   | 4                    | 9                    |
| 89         | london-underground       | 1.52        | 1.75       | 19    | 2.30                | 13.96 | 0.10       | 39  | 0.14  | 0.03 | 2     | 10                   | 11                   | 3                    | 8                    |
| 90         | web-EPA                  | 3.71        | 7.96       | 113   | 4.18                | 4.50  | 0.24       | 10  | -0.30 | 0.07 | 6     | 997                  | 20160                | 20991                | 263470               |
| 91         | web-indochina-2004       | 8.42        | 28.55      | 1105  | 8.38                | 6.42  | 0.18       | 27  | 0.12  | 0.71 | 49    | 210078               | 9187                 | 503                  | 482                  |
| 92         | web-spam                 | 3.22        | 18.82      | 28    | 15.68               | 3.79  | 0.29       | 12  | 0.00  | 0.29 | 35    | 129017               | 1458084              | 18521029             | 320394705            |
| 93         | web-webbase-2001         | 35.76       | 60.96      | 1327  | 3.19                | 10.21 | 0.12       | 23  | -0.10 | 0.22 | 32    | 21115                | 20420                | 8545                 | 27865                |
| 94         | soc-dolphins             | 1.36        | 3.00       | 4     | 5.13                | 3.36  | 0.38       | 8   | -0.04 | 0.26 | 4     | 95                   | 59                   | 142                  | 239                  |
| 95         | soc-firm-hi-tech         | 0.99        | 2.23       | 3     | 5.52                | 2.36  | 0.51       | 5   | -0.09 | 0.45 | 5     | 77                   | 35                   | 69                   | 42                   |
| 96         | soc-hamsterster          | 5.43        | 30.00      | 28    | 16.10               | 3.59  | 0.31       | 10  | 0.02  | 0.54 | 24    | 52651                | 200462               | 2623585              | 36156328             |
| 97         | soc-karate               | 1.40        | 2.77       | 4     | 4.59                | 2.41  | 0.49       | 5   | -0.48 | 0.57 | 4     | 45                   | 36                   | 20                   | 2                    |
| 98         | soc-tribes               | 0.93        | 2.18       | 3     | 7.25                | 1.54  | 0.74       | 3   | 0.05  | 0.54 | 5     | 68                   | 56                   | 47                   | 17                   |
| 99         | soc-wiki-Vote            | 2.42        | 7.06       | 12    | 6.56                | 4.10  | 0.27       | 13  | -0.03 | 0.15 | 9     | 2119                 | 6873                 | 25010                | 104736               |

*Continued on next page*

| <i>No.</i> | <i>Name</i>                      | <i>RPMI</i> | <i>PMI</i> | $n_c$ | $\langle k \rangle$ | $L$   | $E_{glob}$ | $D$ | $r$   | $C$  | $k_s$ | $ \mathcal{H}_3(G) $ | $ \mathcal{H}_4(G) $ | $ \mathcal{H}_5(G) $ | $ \mathcal{H}_6(G) $ |
|------------|----------------------------------|-------------|------------|-------|---------------------|-------|------------|-----|-------|------|-------|----------------------|----------------------|----------------------|----------------------|
| 100        | fb-pages-food                    | 3.08        | 9.00       | 62    | 6.75                | 5.09  | 0.24       | 17  | -0.03 | 0.33 | 11    | 2935                 | 9003                 | 12403                | 42583                |
| 101        | fb-pages-politician              | 4.09        | 19.00      | 205   | 14.12               | 4.66  | 0.23       | 14  | 0.02  | 0.39 | 31    | 174632               | 630811               | 2110870              | 11564939             |
| 102        | fb-pages-public-figure           | 5.58        | 25.44      | 295   | 11.59               | 4.62  | 0.23       | 15  | 0.20  | 0.18 | 42    | 184838               | 3384130              | 45669068             | 870671995            |
| 103        | fb-pages-tvshow                  | 4.98        | 18.28      | 508   | 8.86                | 6.28  | 0.18       | 20  | 0.56  | 0.37 | 56    | 87090                | 35915                | 31987                | 139241               |
| 104        | socfb-Reed98                     | 1.30        | 16.60      | 4     | 39.11               | 2.46  | 0.44       | 6   | 0.02  | 0.32 | 34    | 97137                | 1237142              | 26933744             | 562139763            |
| 105        | socfb-nips-ego                   | 1.58        | 1.53       | 17    | 2.06                | 3.87  | 0.29       | 9   | -0.67 | 0.03 | 3     | 91                   | 15                   | 2                    | 16                   |
| 106        | rt-retweet                       | 1.32        | 1.53       | 10    | 2.44                | 4.31  | 0.28       | 10  | -0.18 | 0.06 | 3     | 12                   | 14                   | 3                    | 4                    |
| 107        | rt-twitter-copen                 | 1.84        | 2.63       | 42    | 2.70                | 5.35  | 0.21       | 14  | -0.10 | 0.08 | 4     | 149                  | 183                  | 349                  | 697                  |
| 108        | rt-assad                         | 3.42        | 4.68       | 50    | 2.61                | 5.21  | 0.21       | 14  | -0.26 | 0.01 | 5     | 220                  | 1629                 | 4035                 | 20053                |
| 109        | rt-damascus                      | 4.61        | 6.09       | 399   | 2.54                | 5.12  | 0.22       | 13  | -0.16 | 0.01 | 5     | 165                  | 1502                 | 2542                 | 17353                |
| 110        | rt-obama                         | 5.58        | 5.70       | 254   | 2.13                | 7.31  | 0.16       | 18  | -0.28 | 0.00 | 3     | 14                   | 199                  | 60                   | 656                  |
| 111        | rt-occupy                        | 3.22        | 4.11       | 268   | 2.44                | 5.72  | 0.20       | 24  | -0.14 | 0.01 | 4     | 115                  | 725                  | 1854                 | 9776                 |
| 112        | rt-voteonedirection              | 12.54       | 13.14      | 66    | 2.16                | 4.75  | 0.25       | 16  | -0.39 | 0.00 | 3     | 3                    | 1899                 | 12                   | 26214                |
| 113        | C125-9                           | 1.00        | 10.94      | 2     | 111.41              | 1.10  | 0.95       | 2   | -0.02 | 0.90 | 102   | 230619               | 191408               | 18995                | 204                  |
| 114        | MANN-a9                          | 1.05        | 3.76       | 1     | 40.80               | 1.07  | 0.96       | 2   | 0.00  | 0.92 | 40    | 11244                | 2106                 | 0                    | 0                    |
| 115        | brock200-1                       | 1.00        | 28.78      | 3     | 148.34              | 1.25  | 0.87       | 2   | -0.00 | 0.75 | 134   | 543700               | 3900964              | 7471673              | 3734928              |
| 116        | gen200-p0-9-44                   | 0.99        | 16.90      | 2     | 179.10              | 1.10  | 0.95       | 2   | -0.01 | 0.90 | 167   | 958030               | 1257669              | 177670               | 3788                 |
| 117        | johnson8-4-4                     | 1.09        | 10.97      | 5     | 53                  | 1.23  | 0.88       | 2   | 0     | 0.74 | 53    | 23940                | 73360                | 4032                 | 3360                 |
| 118        | san200-0-9-1                     | 0.98        | 16.62      | 2     | 179.10              | 1.10  | 0.95       | 2   | 0.04  | 0.90 | 162   | 960241               | 1215190              | 141944               | 822                  |
| 119        | bio-celegansneural               | 1.41        | 7.14       | 4     | 14.46               | 2.46  | 0.44       | 5   | -0.16 | 0.29 | 10    | 3241                 | 15863                | 88393                | 625342               |
| 120        | chesapeake                       | 0.93        | 2.72       | 3     | 8.72                | 1.84  | 0.60       | 3   | -0.38 | 0.45 | 6     | 194                  | 839                  | 228                  | 116                  |
| 121        | delaunay-n10                     | 23.12       | 63.33      | 14    | 5.97                | 10.32 | 0.12       | 20  | -0.12 | 0.44 | 4     | 2047                 | 114                  | 372                  | 729                  |
| 122        | delaunay-n11                     | 63.59       | 174.70     | 18    | 5.98                | 13.35 | 0.09       | 26  | -0.10 | 0.44 | 4     | 4104                 | 270                  | 763                  | 1414                 |
| 123        | insecta-ant-trophallaxis-colony1 | 1.05        | 3.47       | 3     | 12.49               | 1.74  | 0.65       | 3   | 0.00  | 0.39 | 9     | 445                  | 1167                 | 2807                 | 4475                 |
| 124        | insecta-ant-trophallaxis-colony2 | 1.07        | 3.49       | 2     | 12.56               | 1.76  | 0.65       | 4   | -0.15 | 0.42 | 10    | 501                  | 1114                 | 2342                 | 2868                 |
| 125        | mammalia-raccoon-proximity       | 0.73        | 2.53       | 2     | 18.83               | 1.18  | 0.91       | 2   | -0.13 | 0.90 | 17    | 1252                 | 24                   | 0                    | 0                    |
| 126        | reptilia-tortoise-network-bsv    | 1.32        | 3.25       | 9     | 5.54                | 3.46  | 0.34       | 9   | 0.20  | 0.37 | 6     | 293                  | 157                  | 313                  | 437                  |

*Continued on next page*

| <i>No.</i> | <i>Name</i>                    | <i>RPMI</i> | <i>PMI</i> | $n_c$ | $\langle k \rangle$ | $L$   | $E_{glob}$ | $D$ | $r$   | $C$  | $k_s$ | $ \mathcal{H}_3(G) $ | $ \mathcal{H}_4(G) $ | $ \mathcal{H}_5(G) $ | $ \mathcal{H}_6(G) $ |
|------------|--------------------------------|-------------|------------|-------|---------------------|-------|------------|-----|-------|------|-------|----------------------|----------------------|----------------------|----------------------|
| 127        | reptilia-tortoise-network-cs   | 1.10        | 2.60       | 5     | 6                   | 2.40  | 0.52       | 6   | -0.00 | 0.46 | 5     | 96                   | 63                   | 44                   | 32                   |
| 128        | reptilia-tortoise-network-fi   | 1.80        | 3.62       | 54    | 3.97                | 7.93  | 0.16       | 21  | 0.35  | 0.34 | 8     | 743                  | 104                  | 166                  | 321                  |
| 129        | reptilia-tortoise-network-hw   | 1.48        | 1.27       | 2     | 2                   | 1.73  | 0.68       | 3   | -0.73 | 0    | 2     | 0                    | 1                    | 0                    | 0                    |
| 130        | reptilia-tortoise-network-lm   | 1.10        | 2.21       | 4     | 4.88                | 2.64  | 0.45       | 6   | 0.04  | 0.38 | 5     | 78                   | 47                   | 46                   | 38                   |
| 131        | reptilia-tortoise-network-pv   | 1.07        | 2.06       | 3     | 4.45                | 2.46  | 0.52       | 6   | -0.18 | 0.52 | 5     | 51                   | 0                    | 0                    | 0                    |
| 132        | DD199                          | 62.58       | 141.27     | 36    | 4.52                | 16.09 | 0.09       | 59  | 0.33  | 0.47 | 4     | 1186                 | 126                  | 43                   | 52                   |
| 133        | DD68                           | 7.95        | 20.52      | 24    | 5.40                | 12.12 | 0.13       | 41  | 0.43  | 0.44 | 5     | 1472                 | 333                  | 261                  | 551                  |
| 134        | DD687                          | 4.70        | 14.32      | 16    | 7.17                | 6.45  | 0.18       | 17  | 0.36  | 0.47 | 5     | 2523                 | 485                  | 733                  | 1726                 |
| 135        | citeseer                       | 3.51        | 6.47       | 165   | 3.48                | 9.31  | 0.13       | 28  | 0.01  | 0.17 | 7     | 1083                 | 3058                 | 3150                 | 7511                 |
| 136        | cora                           | 2.42        | 5.07       | 149   | 4.08                | 6.31  | 0.18       | 19  | -0.07 | 0.24 | 4     | 1558                 | 1523                 | 1840                 | 4752                 |
| 137        | gene                           | 1.70        | 3.16       | 67    | 3.53                | 7.01  | 0.17       | 22  | 0.14  | 0.22 | 12    | 809                  | 180                  | 92                   | 135                  |
| 138        | internet-industry-partnerships | 1.35        | 3.51       | 6     | 5.75                | 2.98  | 0.37       | 6   | -0.22 | 0.18 | 6     | 328                  | 1434                 | 3950                 | 11671                |
| 139        | webkb-wisc                     | 2.11        | 3.87       | 13    | 3.59                | 3.26  | 0.35       | 8   | -0.19 | 0.21 | 4     | 118                  | 359                  | 95                   | 69                   |
| 140        | tech-WHOIS                     | 3.56        | 17.37      | 102   | 15.23               | 3.54  | 0.30       | 8   | -0.04 | 0.49 | 88    | 782494               | 2934453              | 31835788             | 397659584            |

**Table S2. Metadata of 140 real-world networks, where  $N$  is the number of nodes,  $n_c$  is the number of communities,  $\langle k \rangle$  is the average degree,  $L$  is the average shortest path length,  $E_{glob}$  is the global efficiency,  $D$  is the diameter,  $r$  is the assortativity coefficient,  $C$  is the clustering coefficient,  $k_s$  is the maximum k-core,  $|\mathcal{H}_3(G)|$  is the number of triangles,  $|\mathcal{H}_4(G)|$  is the number of chordless 4-cycles,  $|\mathcal{H}_5(G)|$  is the number of chordless 5-cycles,  $|\mathcal{H}_6(G)|$  is the number of chordless 6-cycles,  $\tilde{\mathcal{H}}_3(G)$  is the density of triangles,  $\tilde{\mathcal{H}}_4(G)$  is the density of chordless 4-cycles,  $\tilde{\mathcal{H}}_5(G)$  is the density of chordless 5-cycles, and  $\tilde{\mathcal{H}}_6(G)$  is the density of chordless 6-cycles. For each real network, we analyze the largest connected component to avoid artifacts from disconnected components.**

| No. | Name                                            | RPMI   | PMI     | $N$  | $ \mathcal{H}_3(G) $ | $ \mathcal{H}_4(G) $ | $ \mathcal{H}_5(G) $ | $ \mathcal{H}_6(G) $ | $\tilde{\mathcal{H}}_3(G)$ | $\tilde{\mathcal{H}}_4(G)$ | $\tilde{\mathcal{H}}_5(G)$ | $\tilde{\mathcal{H}}_6(G)$ |
|-----|-------------------------------------------------|--------|---------|------|----------------------|----------------------|----------------------|----------------------|----------------------------|----------------------------|----------------------------|----------------------------|
| 1   | bn-cat-mixed-species-brain-1                    | 1.0756 | 5.7591  | 65   | 3613                 | 4568                 | 5077                 | 5101                 | 1.9134                     | 0.3519                     | 0.0835                     | 0.0269                     |
| 2   | bn-macaque-rhesus-brain-2                       | 0.9842 | 4.0379  | 91   | 1902                 | 1649                 | 87                   | 0                    | 5.4536                     | 0.6849                     | 0.0058                     | 0.0000                     |
| 3   | bn-macaque-rhesus-cerebral-cortex-1             | 1.1219 | 8.0681  | 91   | 10336                | 16425                | 10777                | 10522                | 2.1246                     | 0.3455                     | 0.0334                     | 0.0071                     |
| 4   | bn-macaque-rhesus-interareal-cortical-network-2 | 1.1343 | 14.1950 | 93   | 29638                | 0                    | 0                    | 0                    | 1.5450                     | 0.0000                     | 0.0000                     | 0.0000                     |
| 5   | bn-mouse-kasthuri-graph-v4                      | 7.9077 | 13.2047 | 987  | 0                    | 770                  | 0                    | 11547                | 0.0000                     | 66.1901                    | 0.0000                     | 158.2541                   |
| 6   | bn-mouse-brain-1                                | 0.8874 | 27.9580 | 213  | 622414               | 3051871              | 9377953              | 16227275             | 1.0832                     | 0.5729                     | 0.6224                     | 1.2779                     |
| 7   | bn-mouse-retina-1                               | 1.3096 | 29.4874 | 1076 | 3289057              | 47425907             | 1286844748           | 31237454889          | 4.1035                     | 0.6590                     | 0.2217                     | 0.0760                     |
| 8   | bn-mouse-visual-cortex-1-2                      | 1.4822 | 2.1108  | 29   | 1                    | 13                   | 5                    | 27                   | 0.2150                     | 1.6637                     | 0.4165                     | 1.6417                     |
| 9   | aves-barn-swallow-contact-network               | 0.9912 | 2.0809  | 17   | 55                   | 51                   | 1                    | 3                    | 1.3666                     | 0.8315                     | 0.0177                     | 0.0982                     |
| 10  | aves-barn-swallow-non-physical                  | 0.8488 | 1.8529  | 17   | 510                  | 3                    | 0                    | 0                    | 1.0390                     | 0.0612                     | 0.0000                     | 0.0000                     |
| 11  | aves-sparrow-social                             | 1.1362 | 4.7888  | 52   | 1857                 | 906                  | 1013                 | 1231                 | 2.0935                     | 0.1877                     | 0.0561                     | 0.0272                     |
| 12  | aves-sparrow-social-2009                        | 0.9034 | 3.2409  | 31   | 721                  | 397                  | 215                  | 26                   | 1.7168                     | 0.3325                     | 0.1127                     | 0.0156                     |
| 13  | aves-sparrow-social-2010                        | 0.9755 | 3.9551  | 40   | 1045                 | 449                  | 503                  | 393                  | 1.7691                     | 0.1889                     | 0.0832                     | 0.0414                     |
| 14  | aves-sparrowlyon-flock-season2                  | 0.9929 | 2.5770  | 43   | 248                  | 81                   | 0                    | 0                    | 4.3842                     | 0.4132                     | 0.0000                     | 0.0000                     |

*Continued on next page*

| <i>No.</i> | <i>Name</i>                    | <i>RPMI</i> | <i>PMI</i> | <i>N</i> | $ \mathcal{H}_3(G) $ | $ \mathcal{H}_4(G) $ | $ \mathcal{H}_5(G) $ | $ \mathcal{H}_6(G) $ | $\tilde{\mathcal{H}}_3(G)$ | $\tilde{\mathcal{H}}_4(G)$ | $\tilde{\mathcal{H}}_5(G)$ | $\tilde{\mathcal{H}}_6(G)$ |
|------------|--------------------------------|-------------|------------|----------|----------------------|----------------------|----------------------|----------------------|----------------------------|----------------------------|----------------------------|----------------------------|
| 15         | aves-sparrowlyon-flock-season3 | 1.0288      | 3.4387     | 27       | 472                  | 42                   | 121                  | 84                   | 1.6113                     | 0.0598                     | 0.1312                     | 0.1300                     |
| 16         | aves-thornbill-farine          | 0.9397      | 3.2263     | 63       | 751                  | 415                  | 0                    | 0                    | 4.2992                     | 0.4609                     | 0.0000                     | 0.0000                     |
| 17         | bio-CE-GT                      | 2.5329      | 7.7224     | 878      | 3959                 | 11705                | 16844                | 80438                | 62.4367                    | 34.6149                    | 8.8399                     | 7.2601                     |
| 18         | bio-CE-LC                      | 3.4967      | 4.7938     | 993      | 148                  | 471                  | 35                   | 357                  | 49.4699                    | 80.7583                    | 2.8965                     | 13.7399                    |
| 19         | bio-CE-PG                      | 0.6010      | 1.5815     | 734      | 4410                 | 0                    | 0                    | 0                    | 145.3446                   | 0.0000                     | 0.0000                     | 0.0000                     |
| 20         | bio-DM-HT                      | 6.3013      | 10.8539    | 2831     | 118                  | 12683                | 41                   | 122                  | 21.1494                    | 943.2514                   | 1.1880                     | 1.3241                     |
| 21         | bio-DM-LC                      | 21.2030     | 44.6744    | 483      | 194                  | 9642                 | 142                  | 5717                 | 16.5433                    | 271.2841                   | 1.2491                     | 15.2560                    |
| 22         | bio-DR-CX                      | 1.4943      | 27.7228    | 3287     | 1026290              | 12091300             | 434866528            | 10500747650          | 44.6076                    | 14.0038                    | 12.7866                    | 7.6477                     |
| 23         | bio-HS-HT                      | 3.4721      | 13.7214    | 2499     | 48888                | 194960               | 625794               | 6824137              | 224.9907                   | 110.5618                   | 41.1943                    | 50.2977                    |
| 24         | bio-SC-LC                      | 4.3169      | 21.5007    | 1999     | 75957                | 1375383              | 4990829              | 97394501             | 53.2249                    | 64.1824                    | 14.6984                    | 17.5668                    |
| 25         | bio-SC-TS                      | 1.0518      | 4.5234     | 101      | 2144                 | 0                    | 0                    | 0                    | 5.9505                     | 0.0000                     | 0.0000                     | 0.0000                     |
| 26         | bio-celegans                   | 1.3685      | 4.9195     | 453      | 3284                 | 4493                 | 11720                | 45296                | 27.5731                    | 5.8814                     | 2.2927                     | 1.2998                     |
| 27         | bio-celegans-dir               | 1.3694      | 4.9195     | 453      | 3284                 | 4493                 | 11720                | 45296                | 27.5731                    | 5.8814                     | 2.2927                     | 1.2998                     |
| 28         | bio-grid-mouse                 | 6.6541      | 9.7835     | 791      | 105                  | 3099                 | 23                   | 17328                | 29.4424                    | 421.3541                   | 1.4284                     | 474.1467                   |
| 29         | bio-grid-plant                 | 3.7729      | 8.2150     | 1272     | 2477                 | 7149                 | 2787                 | 4914                 | 188.7431                   | 170.8749                   | 19.6716                    | 9.8738                     |
| 30         | bio-grid-worm                  | 3.2690      | 6.5846     | 3343     | 2090                 | 32679                | 42919                | 406191               | 219.5663                   | 1192.0956                  | 510.4073                   | 1513.9955                  |
| 31         | bio-yeast                      | 1.8313      | 2.5769     | 1458     | 206                  | 139                  | 113                  | 258                  | 64.7790                    | 21.9205                    | 8.3994                     | 8.6995                     |
| 32         | bio-yeast-protein-inter        | 1.8357      | 2.5769     | 1458     | 206                  | 139                  | 113                  | 258                  | 64.7790                    | 21.9205                    | 8.3994                     | 8.6995                     |
| 33         | ca-AstroPh                     | 3.4334      | 25.1806    | 17903    | 1350014              | 1302079              | 33997621             | 1054735601           | 760.2630                   | 44.5461                    | 66.3281                    | 112.7974                   |
| 34         | ca-CSphd                       | 1.5825      | 1.5309     | 1025     | 4                    | 5                    | 0                    | 1                    | 2.8473                     | 2.3457                     | 0.0000                     | 0.1735                     |
| 35         | ca-CondMat                     | 3.3680      | 11.8434    | 21363    | 171051               | 37757                | 365462               | 4458410              | 1644.2182                  | 56.6743                    | 80.3434                    | 137.8712                   |
| 36         | ca-Erdos992                    | 2.8702      | 4.5561     | 4991     | 1610                 | 1895                 | 5914                 | 27224                | 366.2969                   | 193.4341                   | 254.1202                   | 473.1090                   |
| 37         | ca-GrQc                        | 1.8685      | 5.4007     | 4158     | 47779                | 1115                 | 3358                 | 12502                | 1065.3697                  | 5.1532                     | 3.0211                     | 2.1057                     |
| 38         | ca-HepPh                       | 2.8059      | 21.8267    | 11204    | 3357890              | 820741               | 13431707             | 218007076            | 2176.7817                  | 33.9208                    | 33.2451                    | 31.0833                    |
| 39         | eco-everglades                 | 1.1377      | 7.0286     | 69       | 4348                 | 20426                | 8985                 | 10443                | 1.5723                     | 1.0187                     | 0.0942                     | 0.0359                     |
| 40         | eco-foodweb-baydry             | 1.4322      | 9.3675     | 128      | 8715                 | 139200               | 366032               | 1753157              | 1.4676                     | 1.7580                     | 0.4422                     | 0.2647                     |
| 41         | eco-foodweb-baywet             | 1.4071      | 9.1694     | 128      | 8437                 | 131661               | 350309               | 1686287              | 1.4854                     | 1.7464                     | 0.4443                     | 0.2657                     |
| 42         | eco-mangwet                    | 1.0693      | 7.0692     | 97       | 7494                 | 58777                | 69466                | 159659               | 1.6968                     | 1.2788                     | 0.1996                     | 0.0853                     |

*Continued on next page*

| <i>No.</i> | <i>Name</i>                     | <i>RPMI</i> | <i>PMI</i> | <i>N</i> | $ \mathcal{H}_3(G) $ | $ \mathcal{H}_4(G) $ | $ \mathcal{H}_5(G) $ | $ \mathcal{H}_6(G) $ | $\tilde{\mathcal{H}}_3(G)$ | $\tilde{\mathcal{H}}_4(G)$ | $\tilde{\mathcal{H}}_5(G)$ | $\tilde{\mathcal{H}}_6(G)$ |
|------------|---------------------------------|-------------|------------|----------|----------------------|----------------------|----------------------|----------------------|----------------------------|----------------------------|----------------------------|----------------------------|
| 43         | eco-stmarks                     | 0.9088      | 3.1181     | 54       | 650                  | 2542                 | 2844                 | 4776                 | 1.7910                     | 1.3120                     | 0.3481                     | 0.1797                     |
| 44         | ENZYMES-g118                    | 1.7952      | 2.2674     | 95       | 0                    | 12                   | 2                    | 8                    | 0.0000                     | 2.4613                     | 0.2258                     | 0.4960                     |
| 45         | ENZYMES-g196                    | 1.0641      | 1.8327     | 50       | 17                   | 10                   | 5                    | 10                   | 2.5067                     | 0.6892                     | 0.1659                     | 0.1687                     |
| 46         | ENZYMES-g198                    | 1.1528      | 1.6505     | 55       | 9                    | 5                    | 3                    | 8                    | 2.4608                     | 0.7520                     | 0.2502                     | 0.3821                     |
| 47         | ENZYMES-g203                    | 1.3057      | 2.3312     | 56       | 31                   | 19                   | 6                    | 3                    | 4.0844                     | 1.1092                     | 0.1586                     | 0.0376                     |
| 48         | ENZYMES-g209                    | 1.3509      | 2.2888     | 57       | 31                   | 19                   | 3                    | 5                    | 4.1804                     | 1.1393                     | 0.0816                     | 0.0644                     |
| 49         | ENZYMES-g349                    | 1.4856      | 2.6394     | 64       | 26                   | 20                   | 20                   | 34                   | 3.1120                     | 1.0086                     | 0.4302                     | 0.3235                     |
| 50         | ENZYMES-g465                    | 1.4310      | 2.6237     | 52       | 23                   | 22                   | 17                   | 15                   | 2.5007                     | 1.0181                     | 0.3463                     | 0.1425                     |
| 51         | ENZYMES-g484                    | 1.4834      | 2.0243     | 60       | 7                    | 7                    | 3                    | 3                    | 2.2155                     | 1.2577                     | 0.3058                     | 0.1776                     |
| 52         | ENZYMES-g501                    | 1.4527      | 1.6732     | 66       | 2                    | 20                   | 2                    | 13                   | 0.8425                     | 5.1583                     | 0.3125                     | 1.2474                     |
| 53         | ENZYMES-g532                    | 1.4661      | 2.2658     | 74       | 16                   | 29                   | 19                   | 8                    | 2.8146                     | 2.3615                     | 0.7127                     | 0.1409                     |
| 54         | ENZYMES-g541                    | 1.4041      | 1.7804     | 28       | 2                    | 8                    | 0                    | 1                    | 0.6510                     | 1.7433                     | 0.0000                     | 0.1271                     |
| 55         | econ-mahindas                   | 6.5349      | 30.4553    | 1258     | 3414                 | 1339064              | 61294                | 4128399              | 12.0206                    | 537.3104                   | 2.6550                     | 18.7249                    |
| 56         | econ-poli                       | 4.2807      | 4.8481     | 2343     | 173                  | 325                  | 50                   | 26                   | 87.9741                    | 97.0657                    | 8.2339                     | 2.2696                     |
| 57         | econ-wm3                        | 1.5775      | 10.2173    | 257      | 21697                | 30164                | 21562                | 107057               | 20.5156                    | 2.4056                     | 0.1472                     | 0.0650                     |
| 58         | ia-email-univ                   | 1.7528      | 6.7378     | 1133     | 5343                 | 12628                | 76309                | 598387               | 35.9839                    | 12.0089                    | 9.6973                     | 9.8476                     |
| 59         | ia-hospital-ward-proximity      | 0.9573      | 7.3337     | 75       | 8215                 | 12668                | 18992                | 23780                | 1.7594                     | 0.3522                     | 0.1105                     | 0.0478                     |
| 60         | ia-hospital-ward-proximity-attr | 0.9561      | 7.3337     | 75       | 8215                 | 12668                | 18992                | 23780                | 1.7594                     | 0.3522                     | 0.1105                     | 0.0478                     |
| 61         | ia-infect-hyper                 | 0.9514      | 8.6923     | 113      | 16867                | 69350                | 278748               | 898126               | 1.7237                     | 0.5806                     | 0.2770                     | 0.1572                     |
| 62         | ia-reality                      | 4.4410      | 5.0597     | 6809     | 400                  | 2770                 | 4082                 | 45531                | 209.0681                   | 856.5523                   | 700.4425                   | 4164.0033                  |
| 63         | ia-southernwomen                | 0.8721      | 1.9608     | 18       | 97                   | 25                   | 0                    | 0                    | 1.6241                     | 0.2629                     | 0.0000                     | 0.0000                     |
| 64         | ia-workplace-contacts           | 1.2810      | 5.0535     | 92       | 1752                 | 3997                 | 17575                | 74522                | 2.3778                     | 0.6707                     | 0.4218                     | 0.3031                     |
| 65         | power-1138-bus                  | 2.1787      | 2.9435     | 1138     | 128                  | 78                   | 53                   | 51                   | 45.6484                    | 14.5656                    | 4.8737                     | 2.2240                     |
| 66         | power-494-bus                   | 1.8915      | 2.2946     | 494      | 21                   | 21                   | 10                   | 6                    | 9.4356                     | 5.3761                     | 1.3769                     | 0.4295                     |
| 67         | power-662-bus                   | 1.6901      | 2.4478     | 662      | 59                   | 55                   | 35                   | 39                   | 17.2625                    | 7.9282                     | 2.3435                     | 1.1711                     |
| 68         | power-685-bus                   | 3.7258      | 7.2922     | 685      | 330                  | 192                  | 207                  | 223                  | 37.7558                    | 7.9345                     | 2.9170                     | 1.0359                     |
| 69         | power-US-Grid                   | 4.9971      | 6.9937     | 4941     | 651                  | 324                  | 311                  | 331                  | 205.4184                   | 51.1473                    | 23.0437                    | 11.0593                    |

*Continued on next page*

| <i>No.</i> | <i>Name</i>              | <i>RPMI</i> | <i>PMI</i> | <i>N</i> | $ \mathcal{H}_3(G) $ | $ \mathcal{H}_4(G) $ | $ \mathcal{H}_5(G) $ | $ \mathcal{H}_6(G) $ | $\tilde{\mathcal{H}}_3(G)$ | $\tilde{\mathcal{H}}_4(G)$ | $\tilde{\mathcal{H}}_5(G)$ | $\tilde{\mathcal{H}}_6(G)$ |
|------------|--------------------------|-------------|------------|----------|----------------------|----------------------|----------------------|----------------------|----------------------------|----------------------------|----------------------------|----------------------------|
| 70         | power-bcspwr09           | 3.0977      | 4.5706     | 1723     | 174                  | 159                  | 191                  | 202                  | 48.6513                    | 21.4249                    | 11.6535                    | 5.3691                     |
| 71         | power-bcspwr10           | 3.8988      | 6.5410     | 5300     | 721                  | 700                  | 657                  | 856                  | 142.2820                   | 59.1038                    | 22.2686                    | 11.1898                    |
| 72         | copresence-InVS13        | 0.6581      | 6.2795     | 95       | 101236               | 13423                | 4047                 | 453                  | 1.0850                     | 0.1567                     | 0.3960                     | 2.9278                     |
| 73         | hospital-ward-proximity  | 0.9636      | 7.3337     | 75       | 8215                 | 12668                | 18992                | 23780                | 1.7594                     | 0.3522                     | 0.1105                     | 0.0478                     |
| 74         | infect-hyper             | 0.9573      | 8.6923     | 113      | 16867                | 69350                | 278748               | 898126               | 1.7237                     | 0.5806                     | 0.2770                     | 0.1572                     |
| 75         | primary-school-proximity | 1.1019      | 15.6916    | 242      | 103760               | 760419               | 8321360              | 79399826             | 1.9171                     | 0.5379                     | 0.2968                     | 0.1926                     |
| 76         | road City of Oldenburg   | 2.1546      | 2.4921     | 6105     | 41                   | 124                  | 72                   | 101                  | 20.1475                    | 35.3207                    | 11.1511                    | 8.1694                     |
| 77         | road beijing             | 12.7863     | 18.6076    | 5036     | 153                  | 780                  | 187                  | 154                  | 44.8858                    | 111.7337                   | 12.2715                    | 4.4477                     |
| 78         | road-chesapeake          | 0.9422      | 2.7193     | 39       | 194                  | 839                  | 228                  | 116                  | 1.7580                     | 2.0670                     | 0.1911                     | 0.0424                     |
| 79         | road-euroroad            | 2.3307      | 3.0365     | 1039     | 32                   | 38                   | 52                   | 43                   | 12.1123                    | 7.6863                     | 5.2873                     | 2.1171                     |
| 80         | road-minnesota           | 7.2982      | 9.5668     | 2640     | 53                   | 54                   | 47                   | 52                   | 20.3150                    | 11.0617                    | 4.8302                     | 2.5772                     |
| 81         | tech-routers-rf          | 2.3901      | 6.7771     | 2113     | 10404                | 22816                | 22762                | 142077               | 252.3636                   | 118.3659                   | 23.7590                    | 28.7436                    |
| 82         | email-dnc                | 2.5819      | 6.0927     | 1833     | 9431                 | 16208                | 43358                | 153478               | 523.4261                   | 253.3672                   | 179.5366                   | 162.1184                   |
| 83         | email-univ               | 1.7744      | 6.7378     | 1133     | 5343                 | 12628                | 76309                | 598387               | 35.9839                    | 12.0089                    | 9.6973                     | 9.8476                     |
| 84         | inf-USAir97              | 1.3100      | 5.5779     | 332      | 12181                | 4533                 | 4110                 | 5048                 | 34.7915                    | 1.4675                     | 0.1475                     | 0.0201                     |
| 85         | inf-euroroad             | 2.3747      | 3.0365     | 1039     | 32                   | 38                   | 52                   | 43                   | 12.1123                    | 7.6863                     | 5.2873                     | 2.1171                     |
| 86         | inf-openflights          | 5.6518      | 21.8166    | 2905     | 72843                | 319407               | 1632910              | 11884654             | 349.7525                   | 191.3919                   | 114.9430                   | 94.7289                    |
| 87         | inf-power                | 4.9972      | 6.9937     | 4941     | 651                  | 324                  | 311                  | 331                  | 205.4184                   | 51.1473                    | 23.0437                    | 11.0593                    |
| 88         | london-overground        | 1.5239      | 1.7782     | 369      | 13                   | 12                   | 4                    | 9                    | 6.1614                     | 3.3134                     | 0.6087                     | 0.7313                     |
| 89         | london-underground       | 1.5184      | 1.7520     | 271      | 10                   | 11                   | 3                    | 8                    | 4.9149                     | 3.2085                     | 0.4929                     | 0.7195                     |
| 90         | web-EPA                  | 3.7062      | 7.9616     | 4253     | 997                  | 20160                | 20991                | 263470               | 81.6793                    | 527.6272                   | 164.7368                   | 595.9513                   |
| 91         | web-indochina-2004       | 8.4246      | 28.5535    | 11358    | 210078               | 9187                 | 503                  | 482                  | 2139.7439                  | 14.9081                    | 0.1220                     | 0.0168                     |
| 92         | web-spam                 | 3.2229      | 18.8184    | 4767     | 129017               | 1458084              | 18521029             | 320394705            | 200.7706                   | 194.2912                   | 198.8140                   | 266.9143                   |
| 93         | web-webbase-2001         | 35.7642     | 60.9623    | 16062    | 21115                | 20420                | 8545                 | 27865                | 3914.6051                  | 1584.7703                  | 260.3280                   | 320.0004                   |
| 94         | soc-dolphins             | 1.3573      | 2.9995     | 62       | 95                   | 59                   | 142                  | 239                  | 4.2256                     | 0.8408                     | 0.6750                     | 0.4042                     |
| 95         | soc-firm-hi-tech         | 0.9853      | 2.2311     | 33       | 77                   | 35                   | 69                   | 42                   | 2.7567                     | 0.4717                     | 0.4102                     | 0.1323                     |
| 96         | soc-hamsterster          | 5.4328      | 29.9968    | 2000     | 52651                | 200462               | 2623585              | 36156328             | 75.7396                    | 24.2996                    | 25.3404                    | 26.9436                    |
| 97         | soc-karate               | 1.3983      | 2.7736     | 34       | 45                   | 36                   | 20                   | 2                    | 2.7979                     | 0.9341                     | 0.2437                     | 0.0132                     |
| 98         | soc-tribes               | 0.9268      | 2.1833     | 16       | 68                   | 56                   | 47                   | 17                   | 1.0754                     | 0.7040                     | 0.9233                     | 1.0578                     |
| 99         | soc-wiki-Vote            | 2.4204      | 7.0649     | 889      | 2119                 | 6873                 | 25010                | 104736               | 45.1263                    | 30.2818                    | 21.5558                    | 17.0979                    |

*Continued on next page*

| No. | Name                             | RPMI    | PMI      | N     | $ \mathcal{H}_3(G) $ | $ \mathcal{H}_4(G) $ | $ \mathcal{H}_5(G) $ | $ \mathcal{H}_6(G) $ | $\tilde{\mathcal{H}}_3(G)$ | $\tilde{\mathcal{H}}_4(G)$ | $\tilde{\mathcal{H}}_5(G)$ | $\tilde{\mathcal{H}}_6(G)$ |
|-----|----------------------------------|---------|----------|-------|----------------------|----------------------|----------------------|----------------------|----------------------------|----------------------------|----------------------------|----------------------------|
| 100 | fb-pages-food                    | 3.0802  | 9.0002   | 620   | 2935                 | 9003                 | 12403                | 42583                | 57.3830                    | 35.6805                    | 9.4596                     | 6.0761                     |
| 101 | fb-pages-politician              | 4.0911  | 18.9960  | 5908  | 174632               | 630811               | 2110870              | 11564939             | 372.3151                   | 127.6622                   | 38.1140                    | 17.9313                    |
| 102 | fb-pages-public-figure           | 5.5812  | 25.4414  | 11565 | 184838               | 3384130              | 45669068             | 870671995            | 711.7478                   | 1501.9709                  | 2192.6066                  | 4345.7187                  |
| 103 | fb-pages-tvshow                  | 4.9838  | 18.2799  | 3892  | 87090                | 35915                | 31987                | 139241               | 751.6429                   | 46.8912                    | 5.9379                     | 3.5371                     |
| 104 | socfb-Reed98                     | 1.3020  | 16.6017  | 962   | 97137                | 1237142              | 26933744             | 562139763            | 9.7424                     | 4.6062                     | 3.6419                     | 2.7654                     |
| 105 | socfb-nips-ego                   | 1.5803  | 1.5279   | 2888  | 91                   | 15                   | 2                    | 16                   | 62.0595                    | 6.6210                     | 0.5362                     | 2.5043                     |
| 106 | rt-retweet                       | 1.3223  | 1.5292   | 96    | 12                   | 14                   | 3                    | 4                    | 4.9722                     | 3.4143                     | 0.4189                     | 0.3185                     |
| 107 | rt-twitter-copen                 | 1.8398  | 2.6331   | 761   | 149                  | 183                  | 349                  | 697                  | 45.2019                    | 27.6401                    | 24.7244                    | 22.3428                    |
| 108 | rt-assad                         | 3.4163  | 4.6820   | 2139  | 220                  | 1629                 | 4035                 | 20053                | 74.6746                    | 283.9715                   | 339.2384                   | 781.9029                   |
| 109 | rt-damascus                      | 4.6052  | 6.0862   | 3052  | 165                  | 1502                 | 2542                 | 17353                | 60.7439                    | 291.4672                   | 244.0459                   | 792.1755                   |
| 110 | rt-obama                         | 5.5761  | 5.7018   | 3212  | 14                   | 199                  | 60                   | 656                  | 8.6831                     | 77.3844                    | 13.7277                    | 84.8579                    |
| 111 | rt-occupy                        | 3.2230  | 4.1108   | 3225  | 115                  | 725                  | 1854                 | 9776                 | 47.3359                    | 163.2345                   | 214.2888                   | 557.4450                   |
| 112 | rt-voteonedirection              | 12.5404 | 13.1401  | 2280  | 3                    | 1899                 | 12                   | 26214                | 1.7826                     | 698.0347                   | 2.5616                     | 3124.0963                  |
| 113 | C125-9                           | 0.9957  | 10.9378  | 125   | 230619               | 191408               | 18995                | 204                  | 1.0007                     | 0.9798                     | 1.0676                     | 1.2001                     |
| 114 | MANN-a9                          | 1.0522  | 3.7636   | 45    | 11244                | 2106                 | 0                    | 0                    | 0.9938                     | 1.2049                     | 0.0000                     | 0.0000                     |
| 115 | brock200-1                       | 1.0031  | 28.7842  | 200   | 543700               | 3900964              | 7471673              | 3734928              | 0.9994                     | 1.0046                     | 0.9978                     | 0.9804                     |
| 116 | gen200-p0-9-44                   | 0.9929  | 16.8990  | 200   | 958030               | 1257669              | 177670               | 3788                 | 1.0006                     | 0.9878                     | 0.9889                     | 1.4416                     |
| 117 | johnson8-4-4                     | 1.0894  | 10.9710  | 70    | 23940                | 73360                | 4032                 | 3360                 | 0.9650                     | 1.4249                     | 0.1549                     | 1.0728                     |
| 118 | san200-0-9-1                     | 0.9804  | 16.6245  | 200   | 960241               | 1215190              | 141944               | 822                  | 1.0029                     | 0.9544                     | 0.7900                     | 0.3128                     |
| 119 | bio-celegansneural               | 1.4051  | 7.1399   | 297   | 3241                 | 15863                | 88393                | 625342               | 6.4256                     | 3.2263                     | 1.8241                     | 1.3261                     |
| 120 | chesapeake                       | 0.9266  | 2.7193   | 39    | 194                  | 839                  | 228                  | 116                  | 1.7580                     | 2.0670                     | 0.1911                     | 0.0424                     |
| 121 | delaunay-n10                     | 23.1244 | 63.3303  | 1024  | 2047                 | 114                  | 372                  | 729                  | 57.7590                    | 0.7284                     | 0.5081                     | 0.2057                     |
| 122 | delaunay-n11                     | 63.5916 | 174.7036 | 2048  | 4104                 | 270                  | 763                  | 1414                 | 114.9515                   | 1.6968                     | 1.0121                     | 0.3813                     |
| 123 | insecta-ant-trophallaxis-colony1 | 1.0482  | 3.4683   | 41    | 445                  | 1167                 | 2807                 | 4475                 | 1.3719                     | 0.8547                     | 0.6837                     | 0.5200                     |
| 124 | insecta-ant-trophallaxis-colony2 | 1.0662  | 3.4939   | 39    | 501                  | 1114                 | 2342                 | 2868                 | 1.5167                     | 0.8431                     | 0.6384                     | 0.4157                     |
| 125 | mammalia-raccoon-proximity       | 0.7317  | 2.5290   | 24    | 1252                 | 24                   | 0                    | 0                    | 1.1267                     | 0.0510                     | 0.0000                     | 0.0000                     |
| 126 | reptilia-tortoise-network-bsv    | 1.3165  | 3.2521   | 121   | 293                  | 157                  | 313                  | 437                  | 10.3557                    | 1.4935                     | 0.7943                     | 0.3003                     |

*Continued on next page*

| <i>No.</i> | <i>Name</i>                    | <i>RPMI</i> | <i>PMI</i>  | <i>N</i> | $ \mathcal{H}_3(G) $ | $ \mathcal{H}_4(G) $ | $ \mathcal{H}_5(G) $ | $ \mathcal{H}_6(G) $ | $\tilde{\mathcal{H}}_3(G)$ | $\tilde{\mathcal{H}}_4(G)$ | $\tilde{\mathcal{H}}_5(G)$ | $\tilde{\mathcal{H}}_6(G)$ |
|------------|--------------------------------|-------------|-------------|----------|----------------------|----------------------|----------------------|----------------------|----------------------------|----------------------------|----------------------------|----------------------------|
| 127        | reptilia-tortoise-network-cs   | 1.0989      | 2.6022      | 31       | 96                   | 63                   | 44                   | 32                   | 2.6696                     | 0.6518                     | 0.2058                     | 0.0843                     |
| 128        | reptilia-tortoise-network-fi   | 1.7979      | 3.6190      | 496      | 743                  | 104                  | 166                  | 321                  | 71.3693                    | 3.4253                     | 1.7753                     | 1.0810                     |
| 129        | reptilia-tortoise-network-hw   | 1.4844      | 1.2667      | 6        | 0                    | 1                    | 0                    | 0                    | 0.0000                     | 2.4113                     | 0.0000                     | 0.0000                     |
| 130        | reptilia-tortoise-network-lm   | 1.0986      | 2.2085      | 41       | 78                   | 47                   | 46                   | 38                   | 4.0344                     | 0.9072                     | 0.3634                     | 0.1380                     |
| 131        | reptilia-tortoise-network-pv   | 1.0692      | 2.0606      | 22       | 51                   | 0                    | 0                    | 0                    | 3.4697                     | 0.0000                     | 0.0000                     | 0.0000                     |
| 132        | DD199                          | 62.5752     | 141.2739841 |          | 1186                 | 126                  | 43                   | 52                   | 76.8959                    | 2.4401                     | 0.2347                     | 0.0773                     |
| 133        | DD68                           | 7.9454      | 20.5165     | 775      | 1472                 | 333                  | 261                  | 551                  | 56.0489                    | 3.1824                     | 0.5918                     | 0.2869                     |
| 134        | DD687                          | 4.7037      | 14.3214     | 725      | 2523                 | 485                  | 733                  | 1726                 | 41.0273                    | 1.4998                     | 0.4087                     | 0.1685                     |
| 135        | citeseer                       | 3.5091      | 6.4720      | 2110     | 1083                 | 3058                 | 3150                 | 7511                 | 154.6141                   | 168.1378                   | 62.6671                    | 52.0142                    |
| 136        | cora                           | 2.4179      | 5.0657      | 2485     | 1558                 | 1523                 | 1840                 | 4752                 | 137.6707                   | 44.1636                    | 16.4488                    | 12.5980                    |
| 137        | gene                           | 1.7007      | 3.1640      | 814      | 809                  | 180                  | 92                   | 135                  | 110.5148                   | 9.3966                     | 1.7302                     | 0.8830                     |
| 138        | internet-industry-partnerships | 1.3454      | 3.5067      | 219      | 328                  | 1434                 | 3950                 | 11671                | 10.3337                    | 11.1475                    | 7.3295                     | 5.1209                     |
| 139        | webkb-wisc                     | 2.1146      | 3.8737      | 251      | 118                  | 359                  | 95                   | 69                   | 15.3580                    | 18.0282                    | 1.7579                     | 0.4601                     |
| 140        | tech-WHOIS                     | 3.5623      | 17.3702     | 7476     | 782494               | 2934453              | 31835788             | 397659584            | 1328.0945                  | 437.8254                   | 392.3110                   | 389.3882                   |

**Table S3. Correlations between network metrics and PMI/RPMI.**

|                     | PMI      |          |        | RPMI     |          |        |
|---------------------|----------|----------|--------|----------|----------|--------|
|                     | $\rho_p$ | $\rho_s$ | QCR    | $\rho_p$ | $\rho_s$ | QCR    |
| $\tilde{H}_3(G)$    | 0.2303   | 0.3314   | 0.6286 | 0.2638   | 0.7153   | 0.9000 |
| $\tilde{H}_4(G)$    | 0.1486   | 0.3339   | 0.6000 | 0.2397   | 0.8417   | 0.8857 |
| $\tilde{H}_5(G)$    | 0.0609   | 0.3727   | 0.6286 | 0.0486   | 0.6735   | 0.8429 |
| $\tilde{H}_6(G)$    | 0.0241   | 0.3714   | 0.6429 | 0.0703   | 0.6971   | 0.8000 |
| $n_c$               | 0.1612   | 0.2403   | 0.6286 | 0.2304   | 0.8497   | 0.9857 |
| $\langle k \rangle$ | 0.1144   | 0.4983   | 0.6714 | -0.1246  | -0.4846  | 0.6714 |
| $L$                 | 0.1570   | -0.0044  | 0.5000 | 0.3007   | 0.7912   | 0.8429 |
| $E_{\text{glob}}$   | -0.1595  | -0.0518  | 0.5286 | -0.3164  | -0.8208  | 0.8714 |
| $D$                 | 0.1658   | 0.0462   | 0.5429 | 0.3106   | 0.8109   | 0.8571 |
| $r$                 | 0.1668   | 0.2003   | 0.5899 | 0.1065   | 0.2061   | 0.5571 |
| $C$                 | 0.0893   | 0.2172   | 0.5571 | -0.0855  | -0.5981  | 0.7429 |
| $k_s$               | 0.1652   | 0.6377   | 0.7429 | -0.0765  | -0.1952  | 0.5657 |

$$\mathcal{H}_3(G), \rho_p=0.2303 \quad \rho_s=0.3314, \text{QCR}=0.6286$$

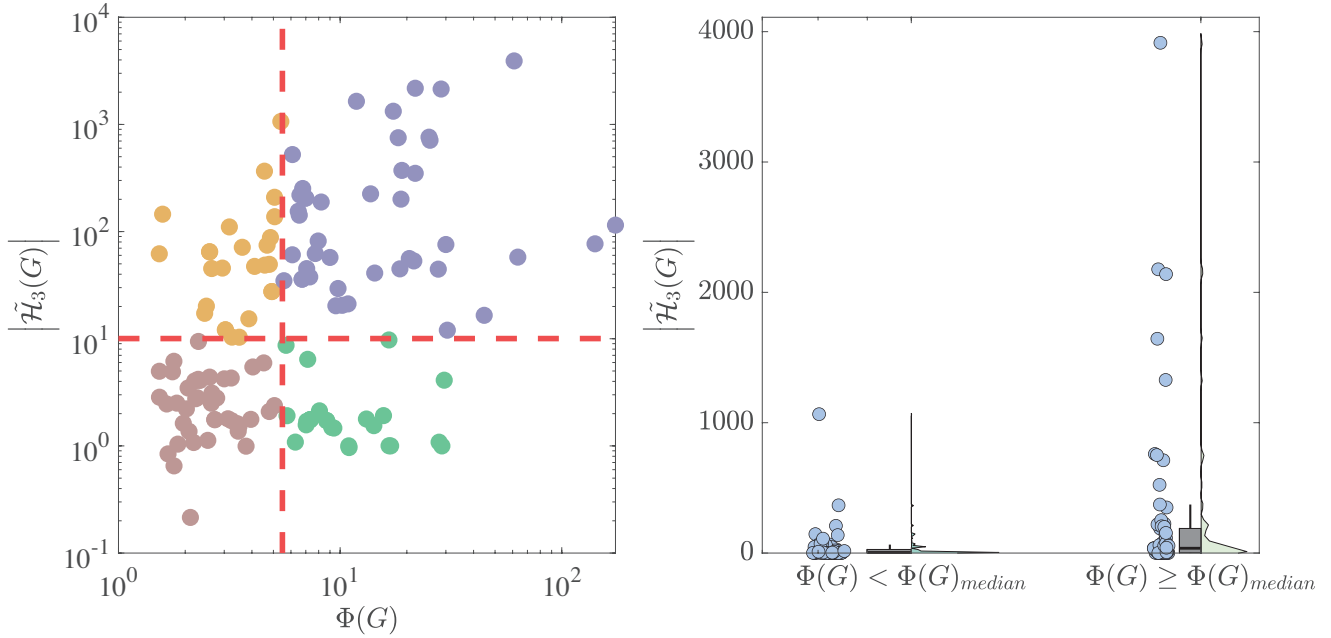

**Fig. S1. Correlation between path multiplicity and chordless 3-cycles in 140 real-world networks.** The metadata and results for all 140 networks are given in Supplementary Materials. **a**, The left part of each panel presents a scatter plot along with the Pearson correlation  $\rho$  between  $\Phi(G)$  and  $|\mathcal{H}_3(G)|$ . Each scatter plot is divided into four quadrants by the median values of  $\Phi(G)$  and  $|\mathcal{H}_3(G)|$  and the Quadrant Count Ratio (QCR) is also shown. The right-hand violin plots show the distribution, mean and median values of the corresponding  $|\mathcal{H}_3(G)|$ , which are divided into two parts based on the median value of PMI. If there are more overlap between two violin subplots, it suggests a weaker correlation between a specific chordless cycle and PMI.

$\tilde{\mathcal{H}}_3(G)$ ,  $\rho_p=0.2638$ ,  $\rho_s=0.7153$ , QCR=0.9000

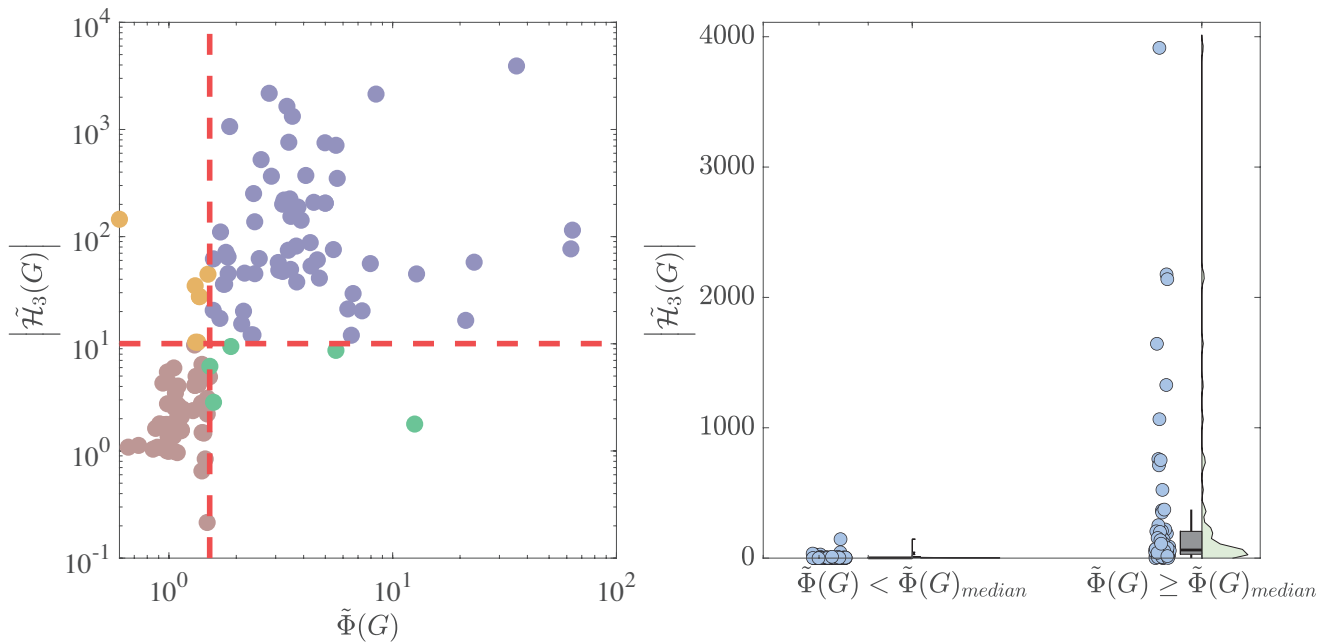

**Fig. S2. Correlation between relative path multiplicity and chordless 3-cycles in 140 real-world networks.** The metadata and results for all 140 networks are given in Supplementary Materials. **a**, The left part of each panel presents a scatter plot along with the Pearson correlation  $\rho$  between  $\tilde{\Phi}(G)$  and  $|\tilde{\mathcal{H}}_3(G)|$ . Each scatter plot is divided into four quadrants by the median values of  $\tilde{\Phi}(G)$  and  $|\tilde{\mathcal{H}}_3(G)|$  and the Quadrant Count Ratio (QCR) is also shown. The right-hand violin plots show the distribution, mean and median values of the corresponding  $|\tilde{\mathcal{H}}_3(G)|$ , which are divided into two parts based on the median value of RPMI. If there are more overlap between two violin subplots, it suggests a weaker correlation between a specific chordless cycle and RPMI.

$\mathcal{H}_4(G)$ ,  $\rho_p=0.1486$ ,  $\rho_s=0.3339$ , QCR=0.6000

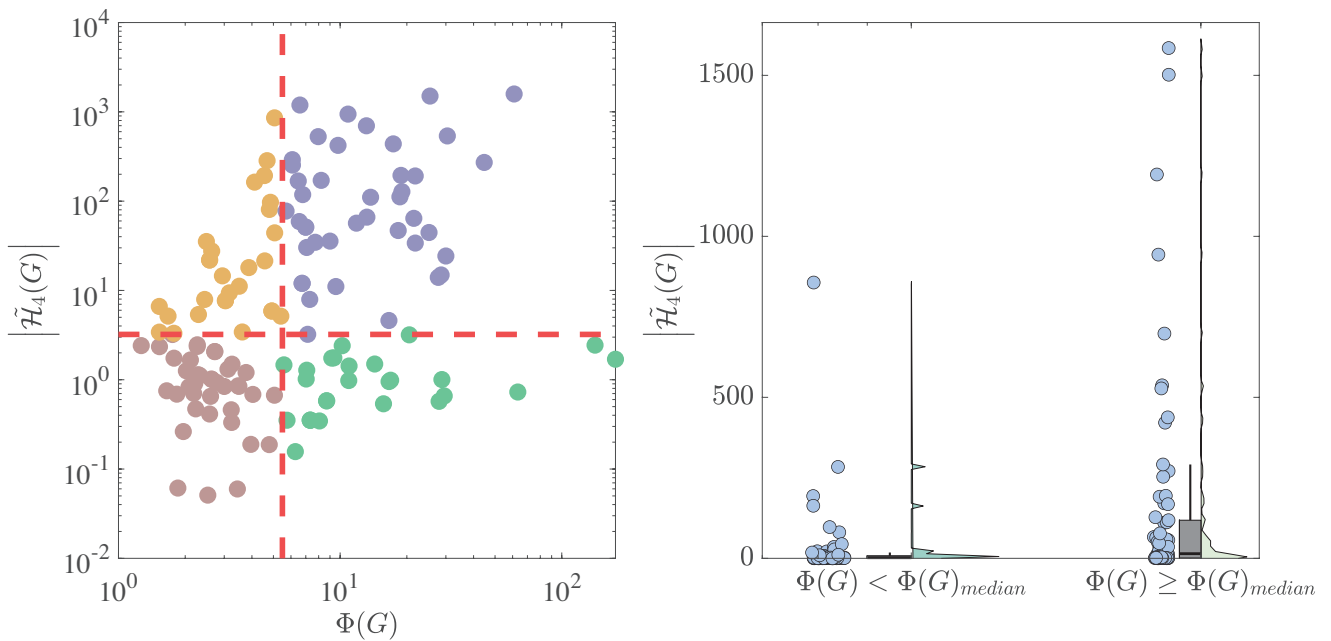

**Fig. S3. Correlation between path multiplicity and chordless 4-cycles in 140 real-world networks.** The metadata and results for all 140 networks are given in Supplementary Materials. **a**, The left part of each panel presents a scatter plot along with the Pearson correlation  $\rho$  between  $\Phi(G)$  and  $|\tilde{\mathcal{H}}_4(G)|$ . Each scatter plot is divided into four quadrants by the median values of  $\Phi(G)$  and  $|\tilde{\mathcal{H}}_4(G)|$  and the Quadrant Count Ratio (QCR) is also shown. The right-hand violin plots show the distribution, mean and median values of the corresponding  $|\tilde{\mathcal{H}}_4(G)|$ , which are divided into two parts based on the median value of PMI. If there are more overlap between two violin subplots, it suggests a weaker correlation between a specific chordless cycle and PMI.

$\tilde{\mathcal{H}}_4(\mathbf{G})$ ,  $\rho_p=0.2397$ ,  $\rho_s=0.8417$ , QCR=0.8857

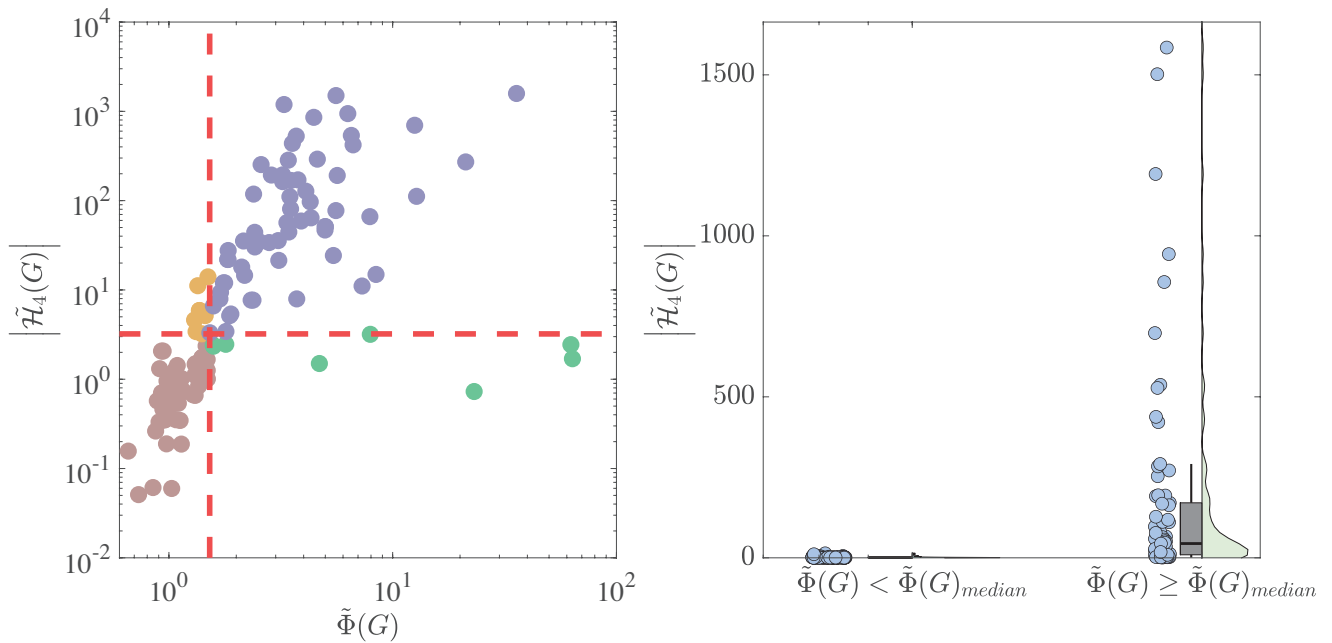

**Fig. S4. Correlation between relative path multiplicity and chordless 4-cycles in 140 real-world networks.** The metadata and results for all 140 networks are given in Supplementary Materials. **a**, The left part of each panel presents a scatter plot along with the Pearson correlation  $\rho$  between  $\tilde{\Phi}(G)$  and  $|\tilde{\mathcal{H}}_4(G)|$ . Each scatter plot is divided into four quadrants by the median values of  $\tilde{\Phi}(G)$  and  $|\tilde{\mathcal{H}}_4(G)|$  and the Quadrant Count Ratio (QCR) is also shown. The right-hand violin plots show the distribution, mean and median values of the corresponding  $|\tilde{\mathcal{H}}_4(G)|$ , which are divided into two parts based on the median value of RPMI. If there are more overlap between two violin subplots, it suggests a weaker correlation between a specific chordless cycle and RPMI.

$$\mathcal{H}_5(\mathbf{G}), \rho_p=0.0609, \rho_s=0.3727, \text{QCR}= 0.6286$$

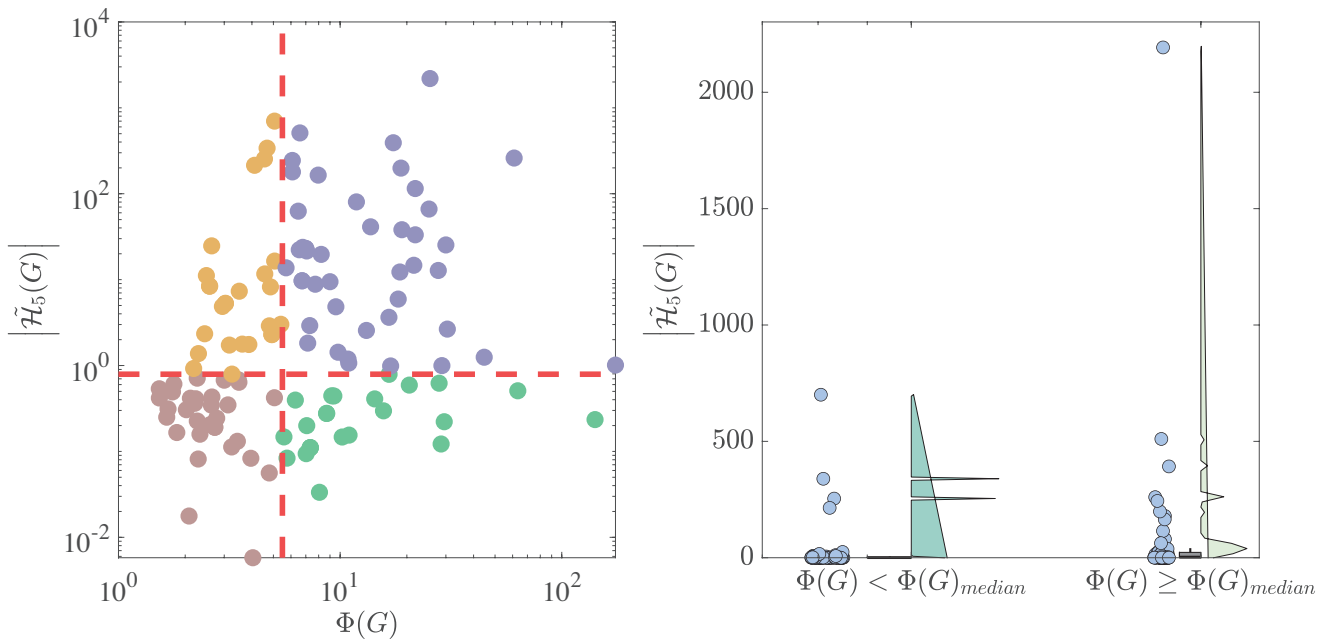

**Fig. S5. Correlation between path multiplicity and chordless 5-cycles in 140 real-world networks.** The metadata and results for all 140 networks are given in Supplementary Materials. **a**, The left part of each panel presents a scatter plot along with the Pearson correlation  $\rho$  between  $\Phi(G)$  and  $|\tilde{\mathcal{H}}_5(G)|$ . Each scatter plot is divided into four quadrants by the median values of  $\Phi(G)$  and  $|\tilde{\mathcal{H}}_5(G)|$  and the Quadrant Count Ratio (QCR) is also shown. The right-hand violin plots show the distribution, mean and median values of the corresponding  $|\tilde{\mathcal{H}}_5(G)|$ , which are divided into two parts based on the median value of PMI. If there are more overlap between two violin subplots, it suggests a weaker correlation between a specific chordless cycle and PMI.

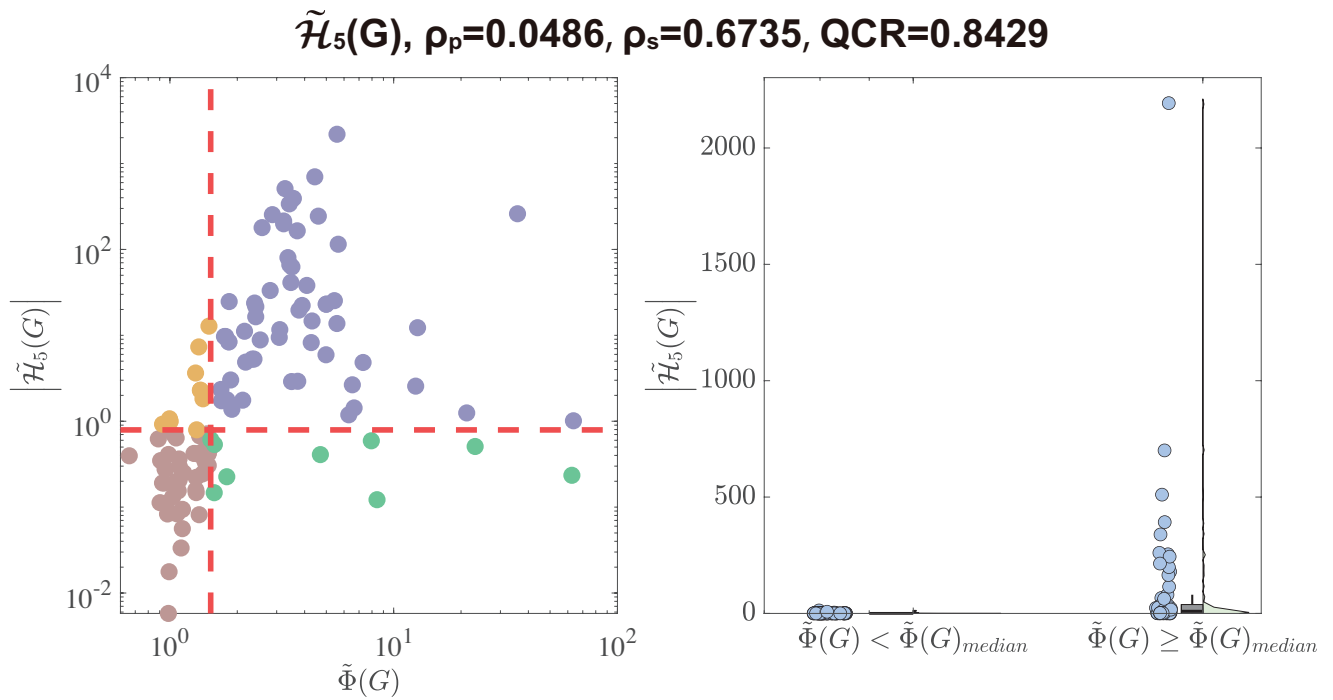

**Fig. S6. Correlation between relative path multiplicity and chordless 5-cycles in 140 real-world networks.** The metadata and results for all 140 networks are given in Supplementary Materials. **a**, The left part of each panel presents a scatter plot along with the Pearson correlation  $\rho$  between  $\tilde{\Phi}(G)$  and  $|\tilde{\mathcal{H}}_5(G)|$ . Each scatter plot is divided into four quadrants by the median values of  $\tilde{\Phi}(G)$  and  $|\tilde{\mathcal{H}}_5(G)|$  and the Quadrant Count Ratio (QCR) is also shown. The right-hand violin plots show the distribution, mean and median values of the corresponding  $|\tilde{\mathcal{H}}_5(G)|$ , which are divided into two parts based on the median value of RPMI. If there are more overlap between two violin subplots, it suggests a weaker correlation between a specific chordless cycle and RPMI.

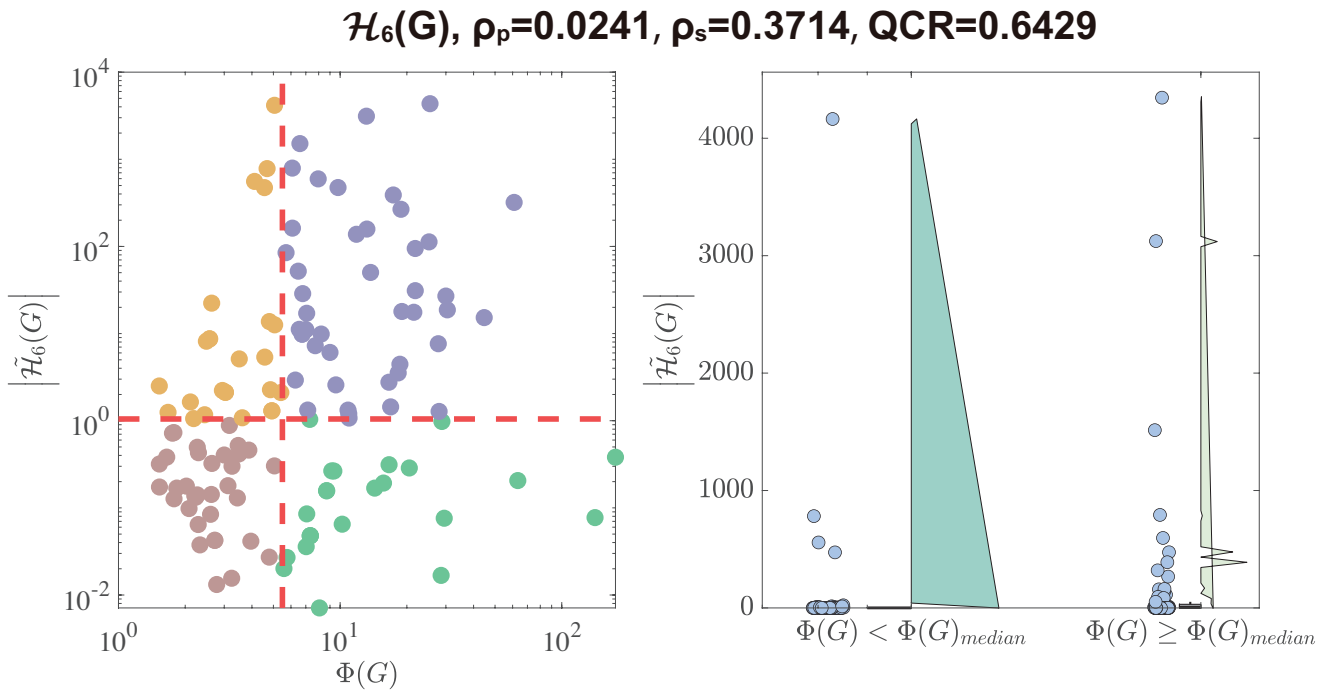

**Fig. S7. Correlation between path multiplicity and chordless 6-cycles in 140 real-world networks.** The metadata and results for all 140 networks are given in Supplementary Materials. **a**, The left part of each panel presents a scatter plot along with the Pearson correlation  $\rho$  between  $\Phi(G)$  and  $|\tilde{\mathcal{H}}_6(G)|$ . Each scatter plot is divided into four quadrants by the median values of  $\Phi(G)$  and  $|\tilde{\mathcal{H}}_6(G)|$  and the Quadrant Count Ratio (QCR) is also shown. The right-hand violin plots show the distribution, mean and median values of the corresponding  $|\tilde{\mathcal{H}}_6(G)|$ , which are divided into two parts based on the median value of PMI. If there are more overlap between two violin subplots, it suggests a weaker correlation between a specific chordless cycle and PMI.

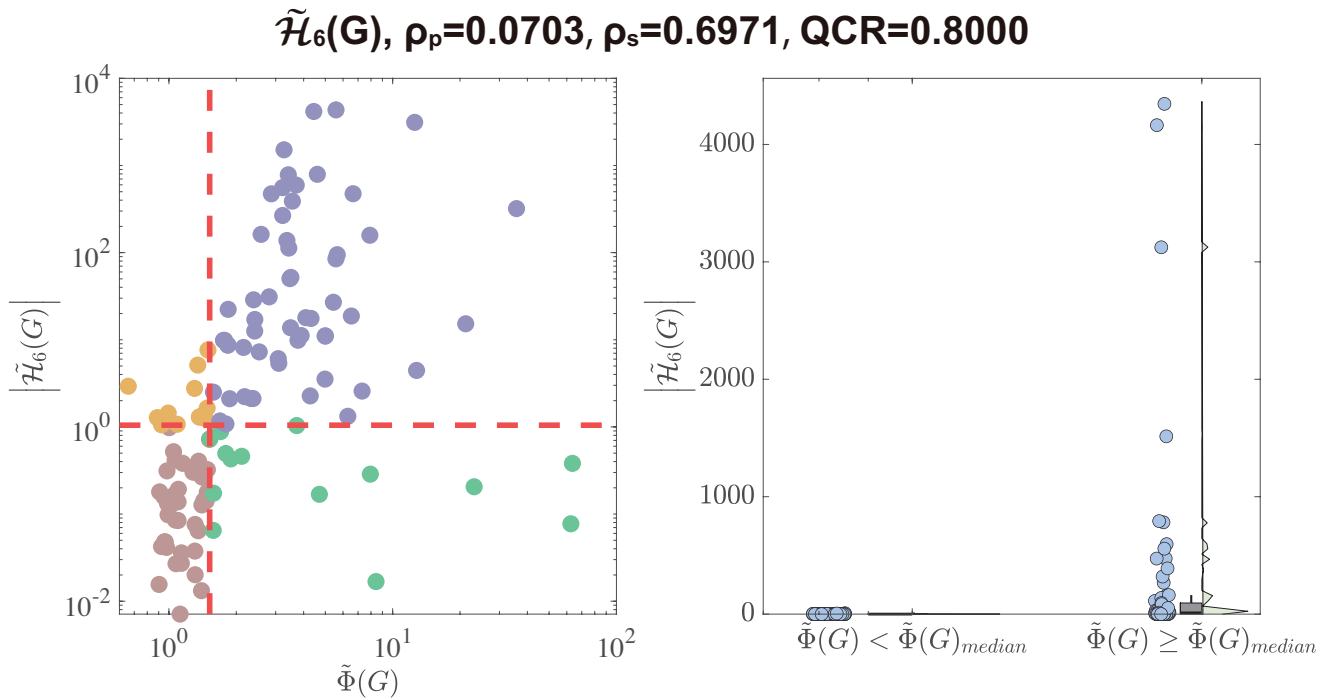

**Fig. S8. Correlation between relative path multiplicity and chordless 6-cycles in 140 real-world networks.** The metadata and results for all 140 networks are given in Supplementary Materials. **a**, The left part of each panel presents a scatter plot along with the Pearson correlation  $\rho$  between  $\tilde{\Phi}(G)$  and  $|\tilde{\mathcal{H}}_6(G)|$ . Each scatter plot is divided into four quadrants by the median values of  $\tilde{\Phi}(G)$  and  $|\tilde{\mathcal{H}}_6(G)|$  and the Quadrant Count Ratio (QCR) is also shown. The right-hand violin plots show the distribution, mean and median values of the corresponding  $|\tilde{\mathcal{H}}_6(G)|$ , which are divided into two parts based on the median value of RPMI. If there are more overlap between two violin subplots, it suggests a weaker correlation between a specific chordless cycle and RPMI.

## Community number, $\rho_p=0.1612$ , $\rho_s=0.2403$ , QCR=0.6286

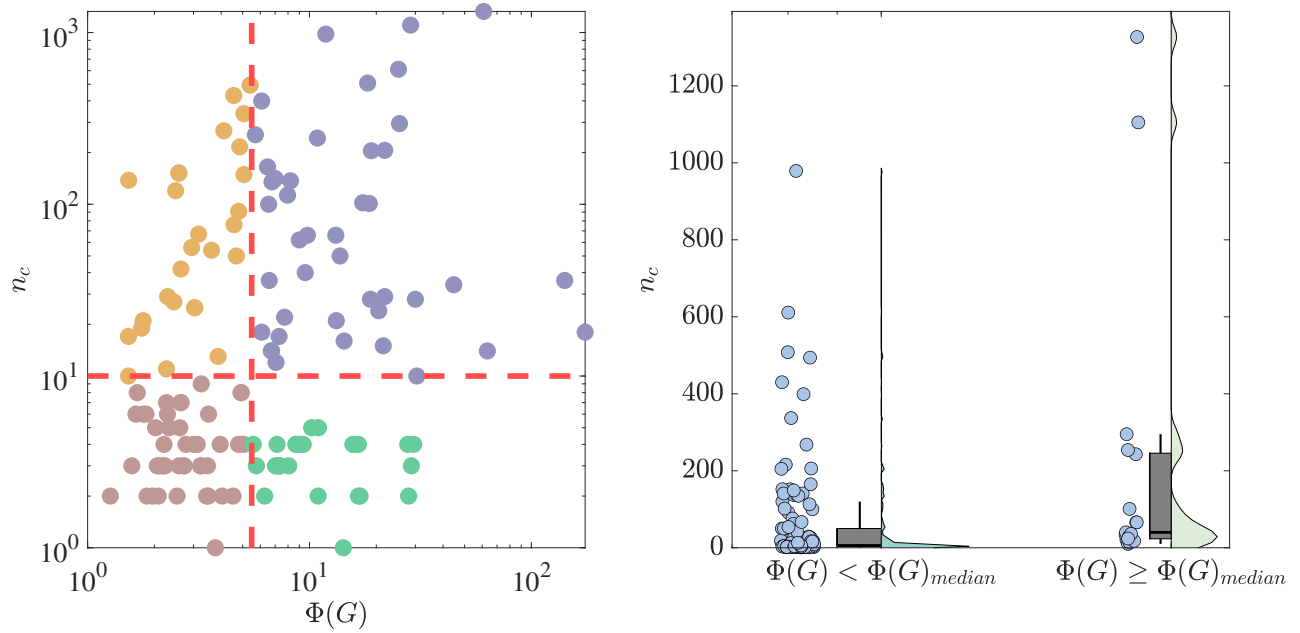

**Fig. S9. Correlation between path multiplicity and community number in 140 real-world networks.** The metadata and results for all 140 networks are given in Supplementary Materials. **a**, The left part of each panel presents a scatter plot along with the Pearson correlation  $\rho$  between  $\Phi(G)$  and  $n_c$ . Each scatter plot is divided into four quadrants by the median values of  $\Phi(G)$  and  $n_c$  and the Quadrant Count Ratio (QCR) is also shown. The right-hand violin plots show the distribution, mean and median values of the corresponding  $n_c$ , which are divided into two parts based on the median value of PMI. If there are more overlap between two violin subplots, it suggests a weaker correlation between the corresponding network metric and PMI.

## Community number, $\rho_p=0.2304$ , $\rho_s=0.8497$ , QCR=0.9857

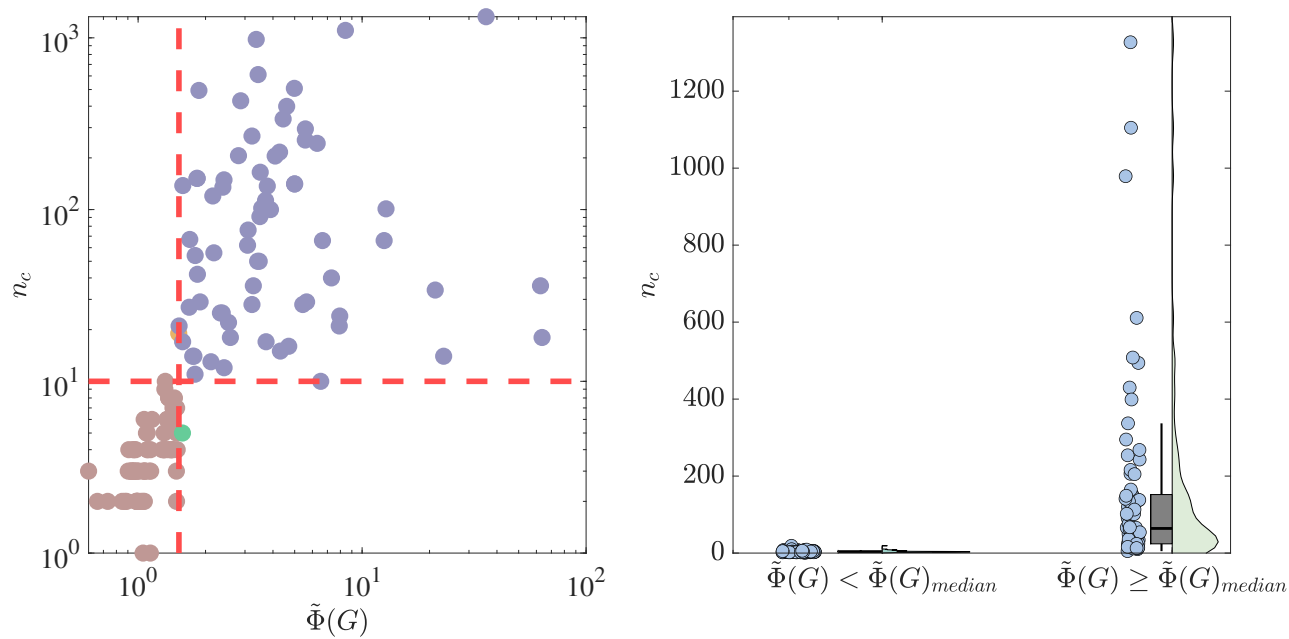

**Fig. S10. Correlation between relative path multiplicity and community number in 140 real-world networks.** The metadata and results for all 140 networks are given in Supplementary Materials. **a**, The left part of each panel presents a scatter plot along with the Pearson correlation  $\rho$  between  $\tilde{\Phi}(G)$  and  $n_c$ . Each scatter plot is divided into four quadrants by the median values of  $\tilde{\Phi}(G)$  and  $n_c$  and the Quadrant Count Ratio (QCR) is also shown. The right-hand violin plots show the distribution, mean and median values of the corresponding  $n_c$ , which are divided into two parts based on the median value of RPMI. If there are more overlap between two violin subplots, it suggests a weaker correlation between the corresponding network metric and RPMI.

**Average degree,  $\rho_p=0.1144$ ,  $\rho_s=0.4983$ , QCR=0.6714**

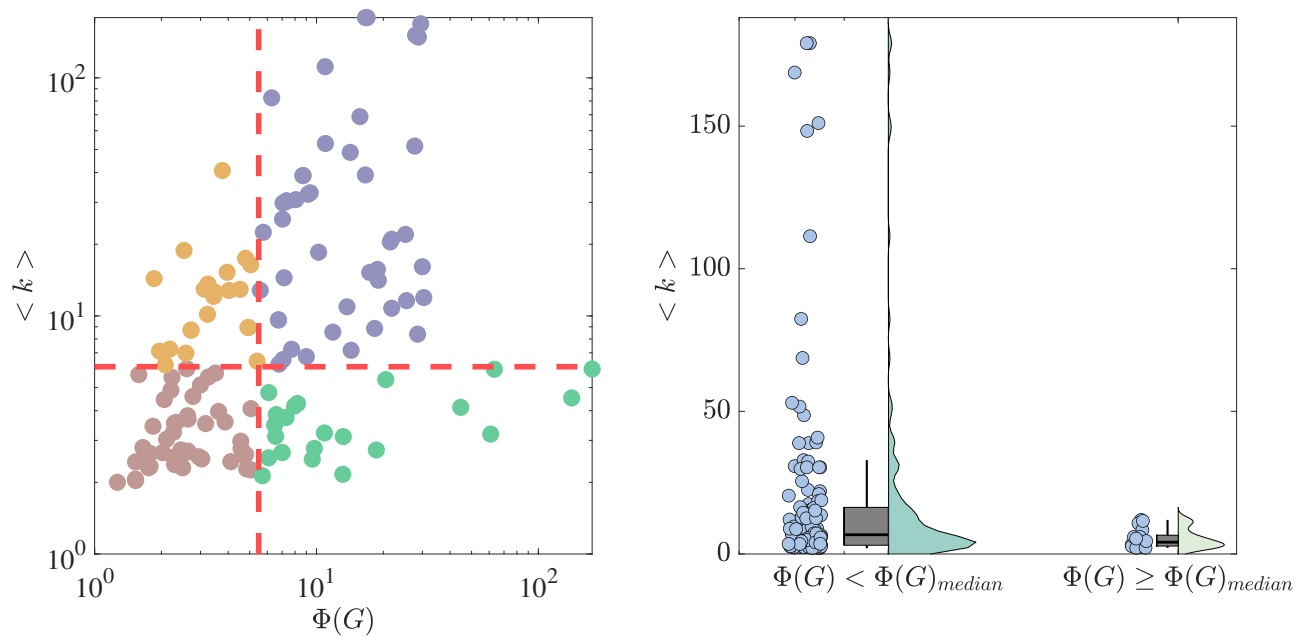

**Fig. S11. Correlation between path multiplicity and average degree in 140 real-world networks.** The metadata and results for all 140 networks are given in Supplementary Materials. **a**, The left part of each panel presents a scatter plot along with the Pearson correlation  $\rho$  between  $\Phi(G)$  and  $\langle k \rangle$ . Each scatter plot is divided into four quadrants by the median values of  $\Phi(G)$  and  $\langle k \rangle$  and the Quadrant Count Ratio (QCR) is also shown. The right-hand violin plots show the distribution, mean and median values of the corresponding  $\langle k \rangle$ , which are divided into two parts based on the median value of PMI. If there are more overlap between two violin subplots, it suggests a weaker correlation between the corresponding network metric and PMI.

Average degree,  $\rho_p=-0.1246$ ,  $\rho_s=-0.4846$ , QCR=0.6714

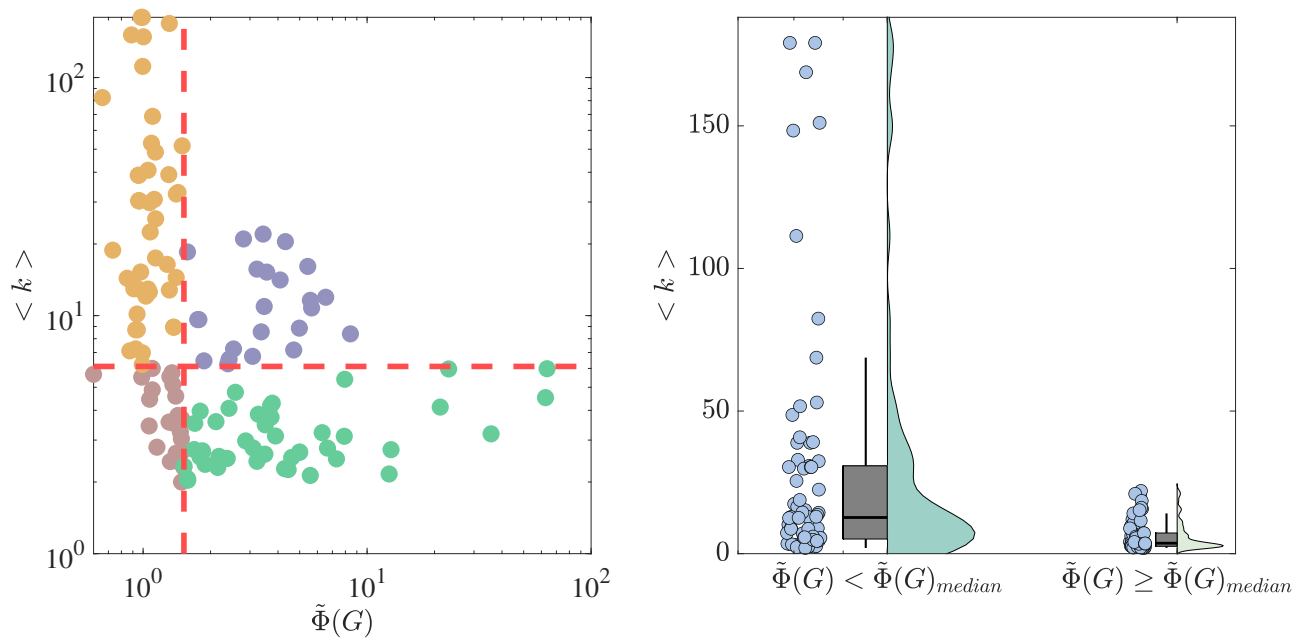

**Fig. S12. Correlation between relative path multiplicity and average degree in 140 real-world networks.** The metadata and results for all 140 networks are given in Supplementary Materials. **a**, The left part of each panel presents a scatter plot along with the Pearson correlation  $\rho$  between  $\tilde{\Phi}(G)$  and  $\langle k \rangle$ . Each scatter plot is divided into four quadrants by the median values of  $\tilde{\Phi}(G)$  and  $\langle k \rangle$  and the Quadrant Count Ratio (QCR) is also shown. The right-hand violin plots show the distribution, mean and median values of the corresponding  $\langle k \rangle$ , which are divided into two parts based on the median value of RPMI. If there are more overlap between two violin subplots, it suggests a weaker correlation between the corresponding network metric and RPMI.

**Average shortest path distance,  $\rho_p=0.1570$ ,  $\rho_s=-0.0044$ , QCR=0.5000**

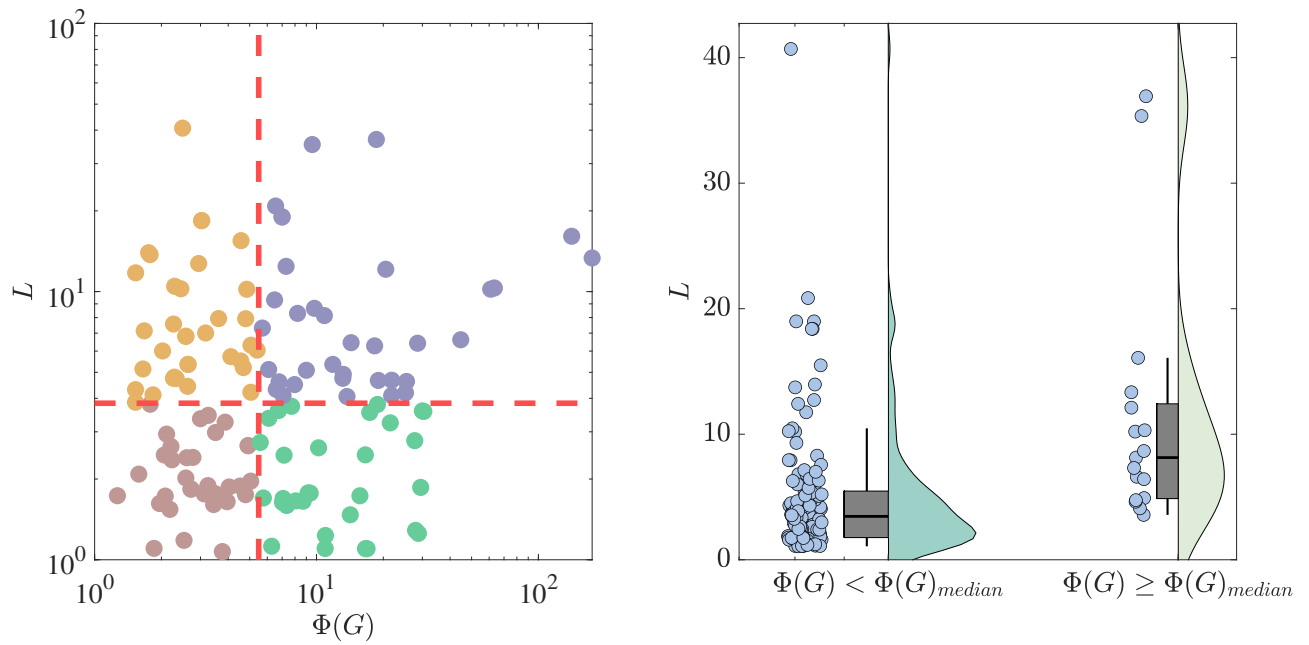

**Fig. S13. Correlation between path multiplicity and average shortest path distance in 140 real-world networks.** The metadata and results for all 140 networks are given in Supplementary Materials. **a**, The left part of each panel presents a scatter plot along with the Pearson correlation  $\rho$  between  $\Phi(G)$  and  $L$ . Each scatter plot is divided into four quadrants by the median values of  $\Phi(G)$  and  $L$  and the Quadrant Count Ratio (QCR) is also shown. The right-hand violin plots show the distribution, mean and median values of the corresponding  $L$ , which are divided into two parts based on the median value of PMI. If there are more overlap between two violin subplots, it suggests a weaker correlation between the corresponding network metric and PMI.

**Average shortest path distance,  $\rho_p=0.3007$ ,  $\rho_s=0.7912$ , QCR=0.8429**

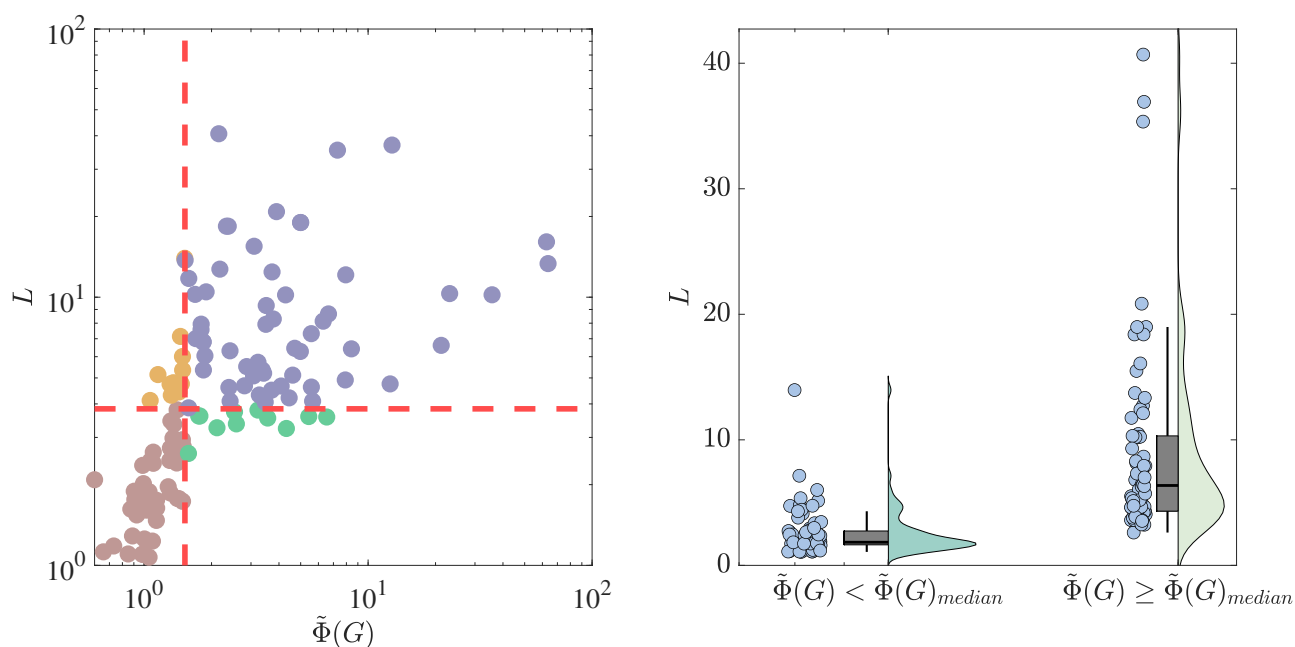

**Fig. S14. Correlation between relative path multiplicity and average shortest path distance in 140 real-world networks.** The metadata and results for all 140 networks are given in Supplementary Materials. **a**, The left part of each panel presents a scatter plot along with the Pearson correlation  $\rho$  between  $\tilde{\Phi}(G)$  and  $L$ . Each scatter plot is divided into four quadrants by the median values of  $\tilde{\Phi}(G)$  and  $L$  and the Quadrant Count Ratio (QCR) is also shown. The right-hand violin plots show the distribution, mean and median values of the corresponding  $L$ , which are divided into two parts based on the median value of RPMI. If there are more overlap between two violin subplots, it suggests a weaker correlation between the corresponding network metric and RPMI.

**Global efficiency,  $\rho_p=-0.1595$ ,  $\rho_s=-0.0518$ , QCR=0.5286**

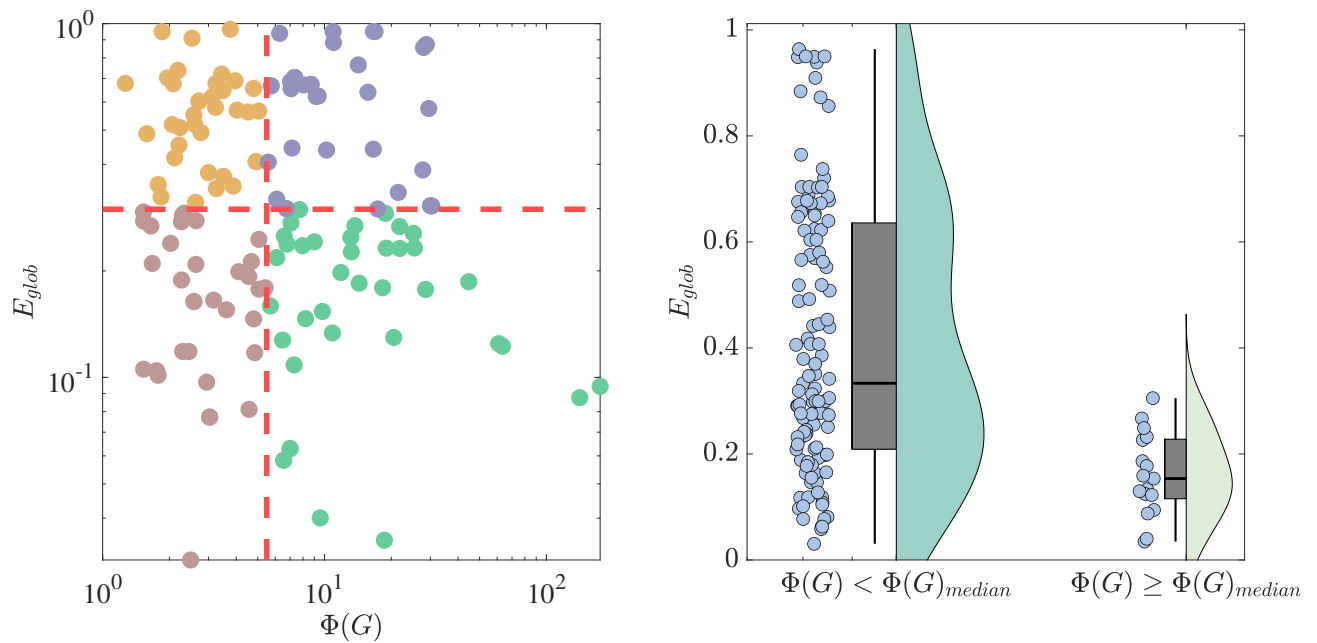

**Fig. S15. Correlation between path multiplicity and global efficiency in 140 real-world networks.** The metadata and results for all 140 networks are given in Supplementary Materials. **a**, The left part of each panel presents a scatter plot along with the Pearson correlation  $\rho$  between  $\Phi(G)$  and  $E_{glob}$ . Each scatter plot is divided into four quadrants by the median values of  $\Phi(G)$  and  $E_{glob}$  and the Quadrant Count Ratio (QCR) is also shown. The right-hand violin plots show the distribution, mean and median values of the corresponding  $E_{glob}$ , which are divided into two parts based on the median value of PMI. If there are more overlap between two violin subplots, it suggests a weaker correlation between the corresponding network metric and PMI.

## Global efficiency, $\rho_p=-0.3164$ , $\rho_s=-0.8208$ , QCR=0.8714

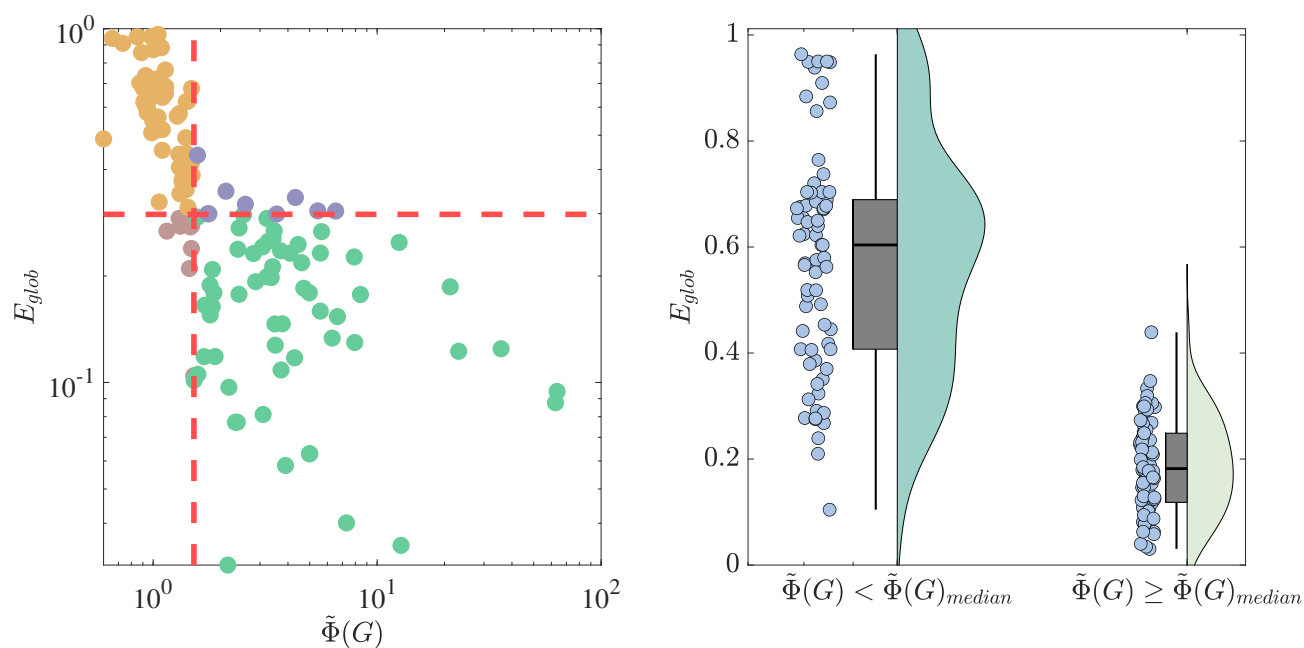

**Fig. S16. Correlation between relative path multiplicity and global efficiency in 140 real-world networks.** The metadata and results for all 140 networks are given in Supplementary Materials. **a**, The left part of each panel presents a scatter plot along with the Pearson correlation  $\rho$  between  $\tilde{\Phi}(G)$  and  $E_{glob}$ . Each scatter plot is divided into four quadrants by the median values of  $\tilde{\Phi}(G)$  and  $E_{glob}$  and the Quadrant Count Ratio (QCR) is also shown. The right-hand violin plots show the distribution, mean and median values of the corresponding  $E_{glob}$ , which are divided into two parts based on the median value of RPMI. If there are more overlap between two violin subplots, it suggests a weaker correlation between the corresponding network metric and RPMI.

## Diameter, $\rho_p=0.1658$ , $\rho_s=0.0462$ , QCR=0.5429

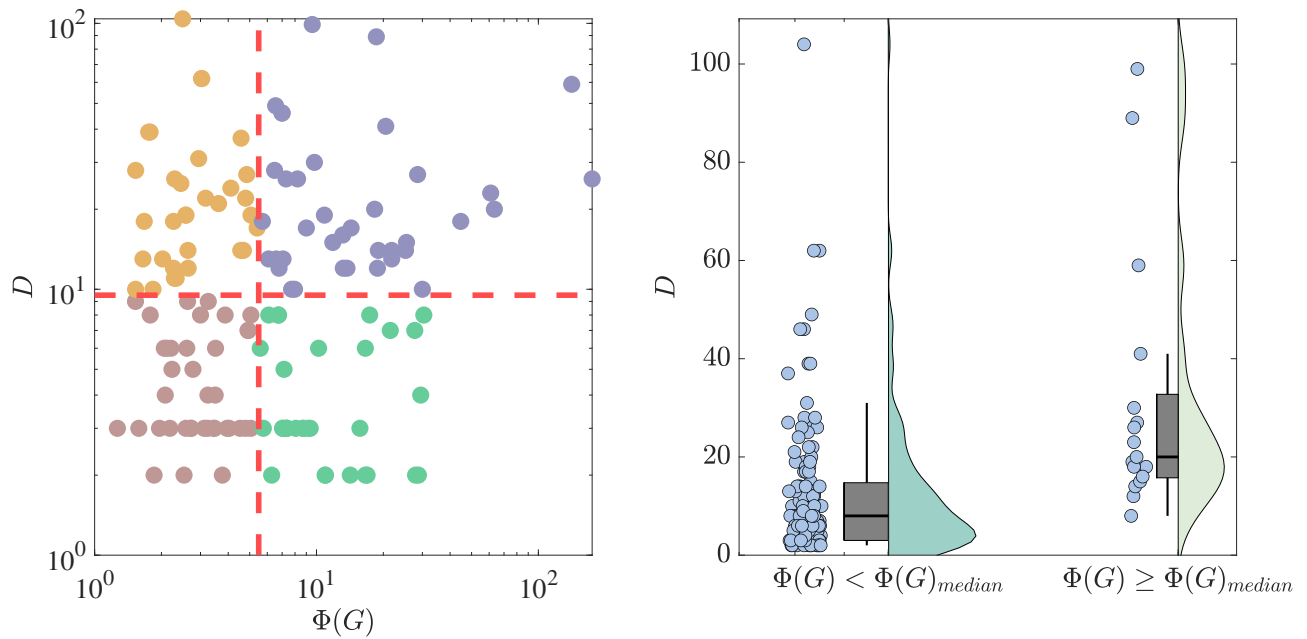

**Fig. S17. Correlation between path multiplicity and diameter in 140 real-world networks.** The metadata and results for all 140 networks are given in Supplementary Materials. **a**, The left part of each panel presents a scatter plot along with the Pearson correlation  $\rho$  between  $\Phi(G)$  and  $D$ . Each scatter plot is divided into four quadrants by the median values of  $\Phi(G)$  and  $D$  and the Quadrant Count Ratio (QCR) is also shown. The right-hand violin plots show the distribution, mean and median values of the corresponding  $D$ , which are divided into two parts based on the median value of PMI. If there are more overlap between two violin subplots, it suggests a weaker correlation between the corresponding network metric and PMI.

## Diameter, $\rho_p=0.3106$ , $\rho_s=0.8109$ , QCR=0.8571

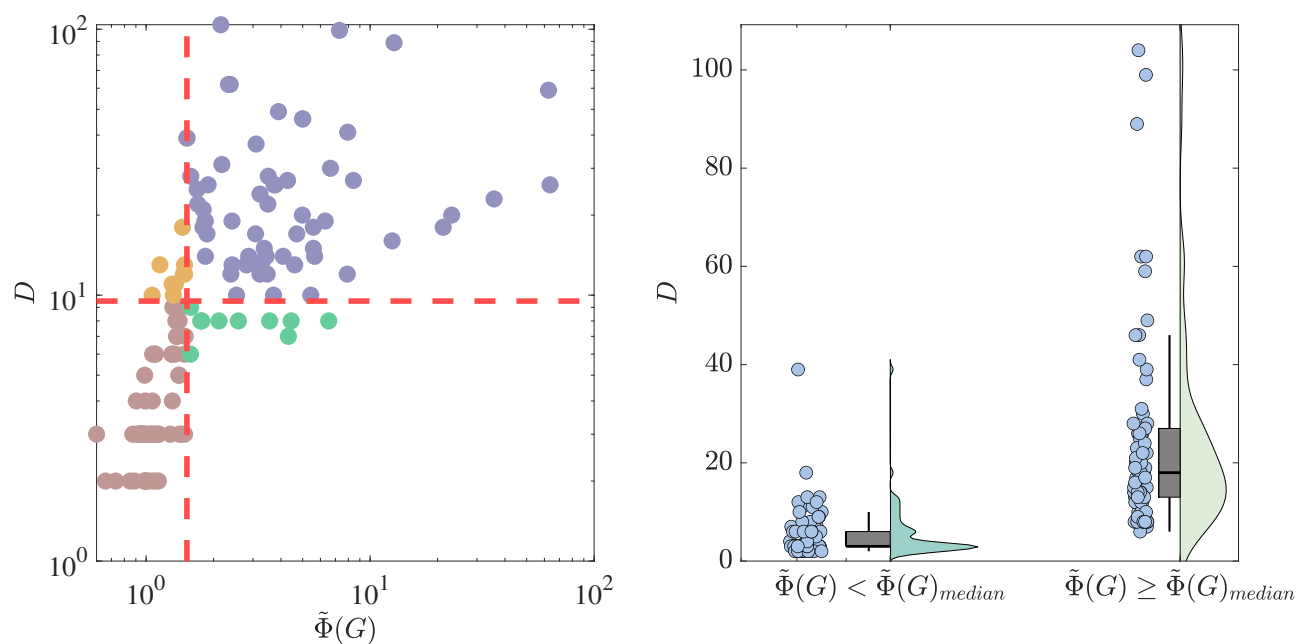

**Fig. S18. Correlation between relative path multiplicity and diameter in 140 real-world networks.** The metadata and results for all 140 networks are given in Supplementary Materials. **a**, The left part of each panel presents a scatter plot along with the Pearson correlation  $\rho$  between  $\tilde{\Phi}(G)$  and  $D$ . Each scatter plot is divided into four quadrants by the median values of  $\tilde{\Phi}(G)$  and  $D$  and the Quadrant Count Ratio (QCR) is also shown. The right-hand violin plots show the distribution, mean and median values of the corresponding  $D$ , which are divided into two parts based on the median value of RPMI. If there are more overlap between two violin subplots, it suggests a weaker correlation between the corresponding network metric and RPMI.

## Assortativity coefficient, $\rho_p=0.1668$ , $\rho_s=0.2003$ , QCR=0.5857

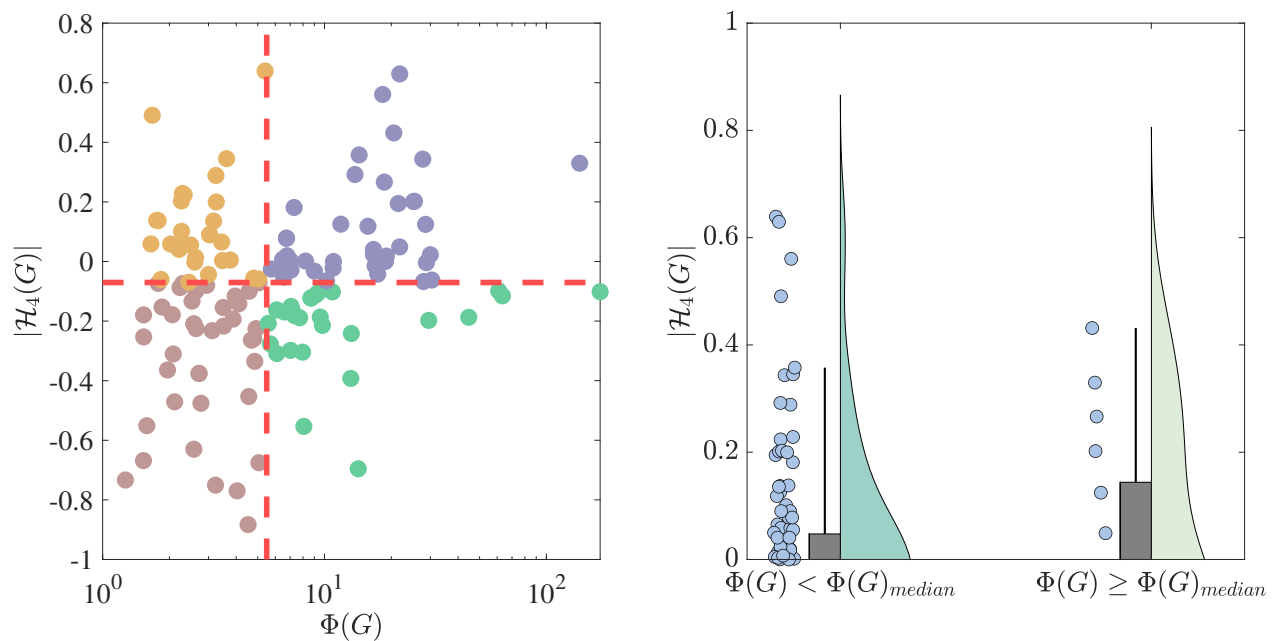

**Fig. S19. Correlation between path multiplicity and assortativity coefficient in 140 real-world networks.** The metadata and results for all 140 networks are given in Supplementary Materials. **a**, The left part of each panel presents a scatter plot along with the Pearson correlation  $\rho$  between  $\Phi(G)$  and  $r$ . Each scatter plot is divided into four quadrants by the median values of  $\Phi(G)$  and  $r$  and the Quadrant Count Ratio (QCR) is also shown. The right-hand violin plots show the distribution, mean and median values of the corresponding  $r$ , which are divided into two parts based on the median value of PMI. If there are more overlap between two violin subplots, it suggests a weaker correlation between the corresponding network metric and PMI.

**Assortativity coefficient,  $\rho_p=0.1065$ ,  $\rho_s=0.2061$ , QCR=0.5571**

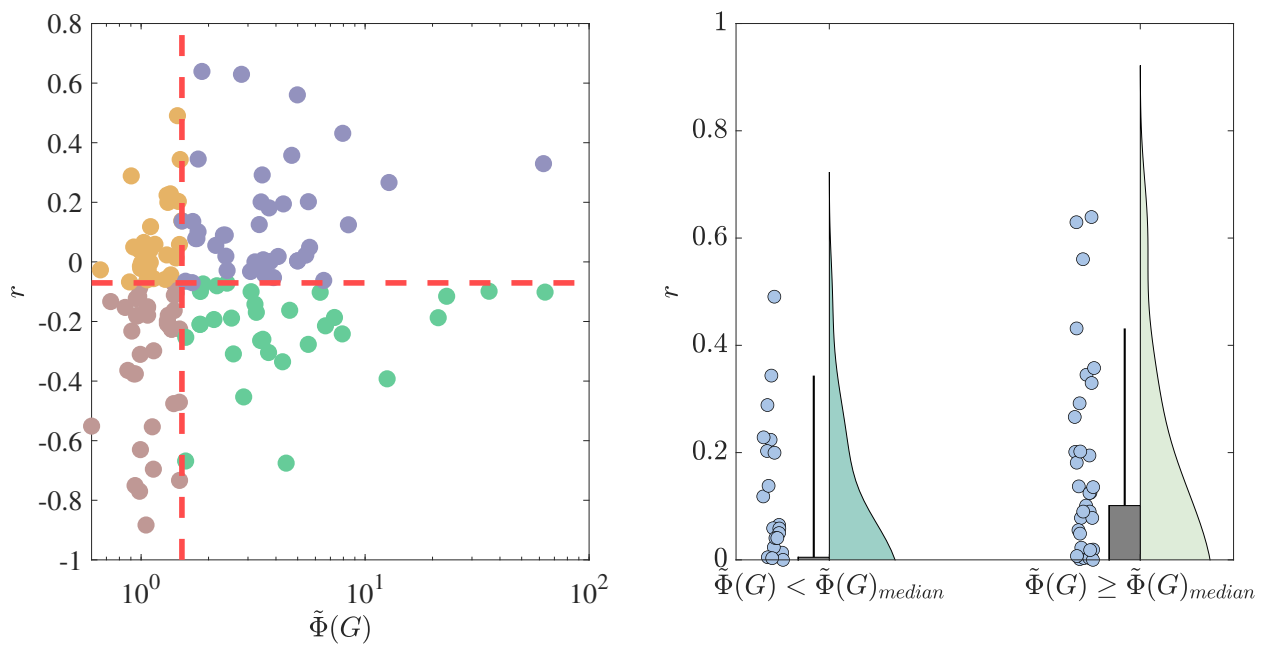

**Fig. S20. Correlation between relative path multiplicity and assortativity coefficient in 140 real-world networks.** The metadata and results for all 140 networks are given in Supplementary Materials. **a**, The left part of each panel presents a scatter plot along with the Pearson correlation  $\rho$  between  $\tilde{\Phi}(G)$  and  $r$ . Each scatter plot is divided into four quadrants by the median values of  $\tilde{\Phi}(G)$  and  $r$  and the Quadrant Count Ratio (QCR) is also shown. The right-hand violin plots show the distribution, mean and median values of the corresponding  $r$ , which are divided into two parts based on the median value of RPMI. If there are more overlap between two violin subplots, it suggests a weaker correlation between the corresponding network metric and RPMI.

## Clustering coefficient, $\rho_p=0.0893$ , $\rho_s=0.2172$ , QCR=0.5571

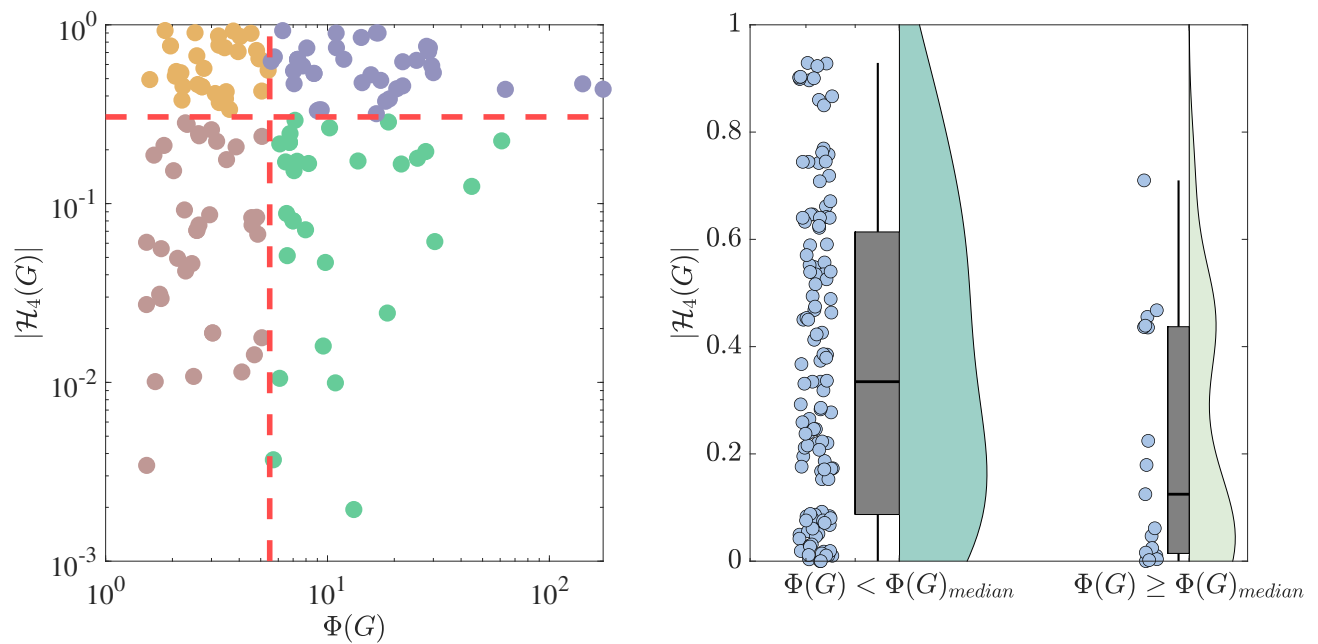

**Fig. S21. Correlation between path multiplicity and clustering coefficient in 140 real-world networks.** The metadata and results for all 140 networks are given in Supplementary Materials. **a**, The left part of each panel presents a scatter plot along with the Pearson correlation  $\rho$  between  $\Phi(G)$  and  $C$ . Each scatter plot is divided into four quadrants by the median values of  $\Phi(G)$  and  $C$  and the Quadrant Count Ratio (QCR) is also shown. The right-hand violin plots show the distribution, mean and median values of the corresponding  $C$ , which are divided into two parts based on the median value of PMI. If there are more overlap between two violin subplots, it suggests a weaker correlation between the corresponding network metric and PMI.

## Clustering coefficient, $\rho_p=-0.0855$ , $\rho_s=-0.5981$ , QCR=0.7429

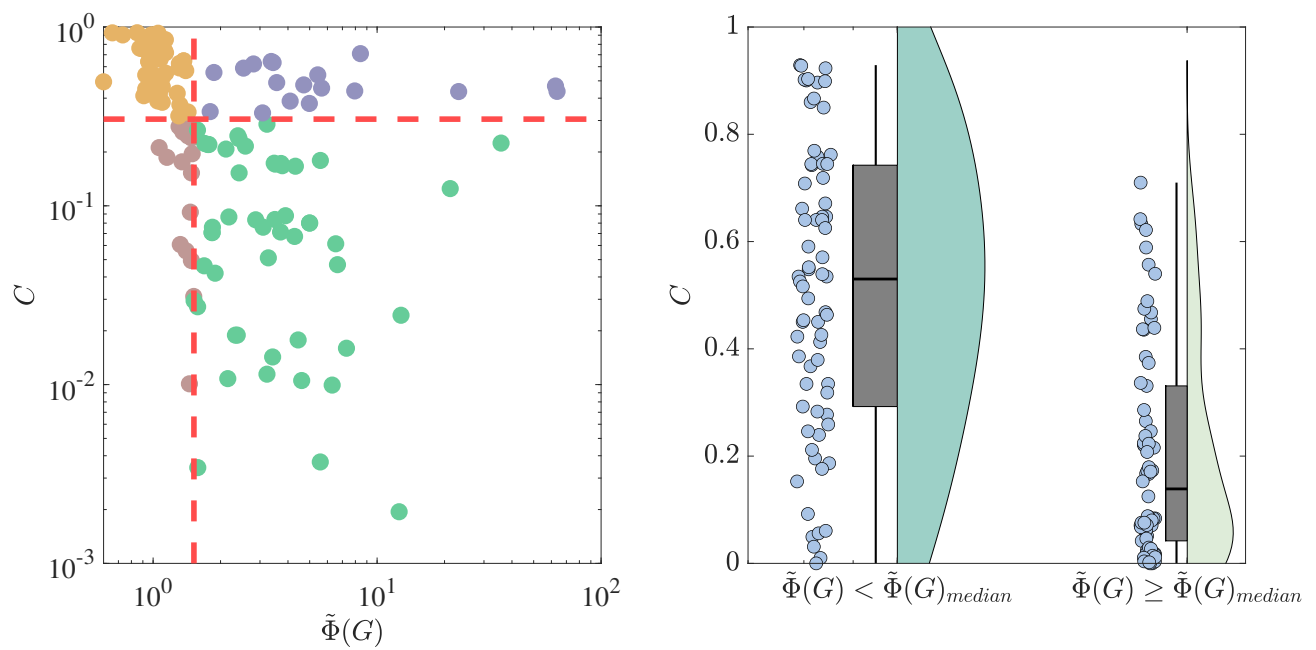

**Fig. S22. Correlation between relative path multiplicity and clustering coefficient in 140 real-world networks.** The metadata and results for all 140 networks are given in Supplementary Materials. **a**, The left part of each panel presents a scatter plot along with the Pearson correlation  $\rho$  between  $\tilde{\Phi}(G)$  and  $C$ . Each scatter plot is divided into four quadrants by the median values of  $\tilde{\Phi}(G)$  and  $C$  and the Quadrant Count Ratio (QCR) is also shown. The right-hand violin plots show the distribution, mean and median values of the corresponding  $C$ , which are divided into two parts based on the median value of RPMI. If there are more overlap between two violin subplots, it suggests a weaker correlation between the corresponding network metric and RPMI.

### K shell, $\rho_p=0.1652$ , $\rho_s=0.6377$ , QCR=0.7429

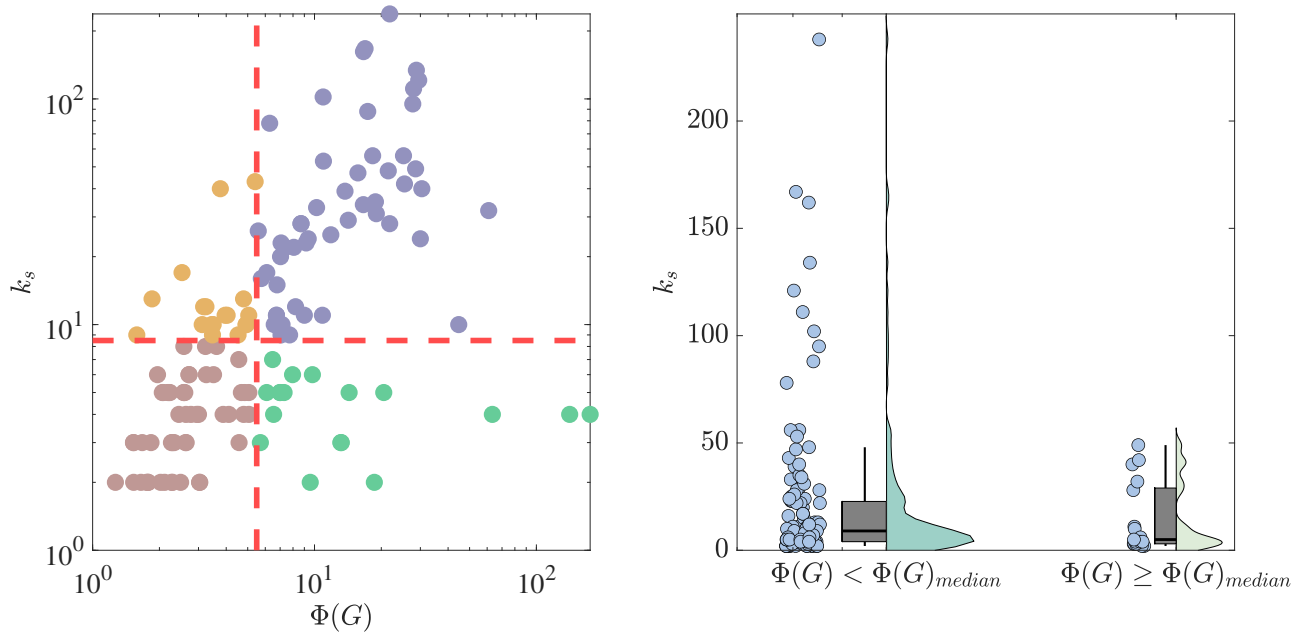

**Fig. S23. Correlation between path multiplicity and K shell in 140 real-world networks.** The metadata and results for all 140 networks are given in Supplementary Materials. **a**, The left part of each panel presents a scatter plot along with the Pearson correlation  $\rho$  between  $\Phi(G)$  and  $k_s$ . Each scatter plot is divided into four quadrants by the median values of  $\Phi(G)$  and  $k_s$  and the Quadrant Count Ratio (QCR) is also shown. The right-hand violin plots show the distribution, mean and median values of the corresponding  $k_s$ , which are divided into two parts based on the median value of PMI. If there are more overlap between two violin subplots, it suggests a weaker correlation between the corresponding network metric and PMI.

**K shell,  $\rho_p=-0.0765$ ,  $\rho_s=-0.1952$ , QCR=0.5857**

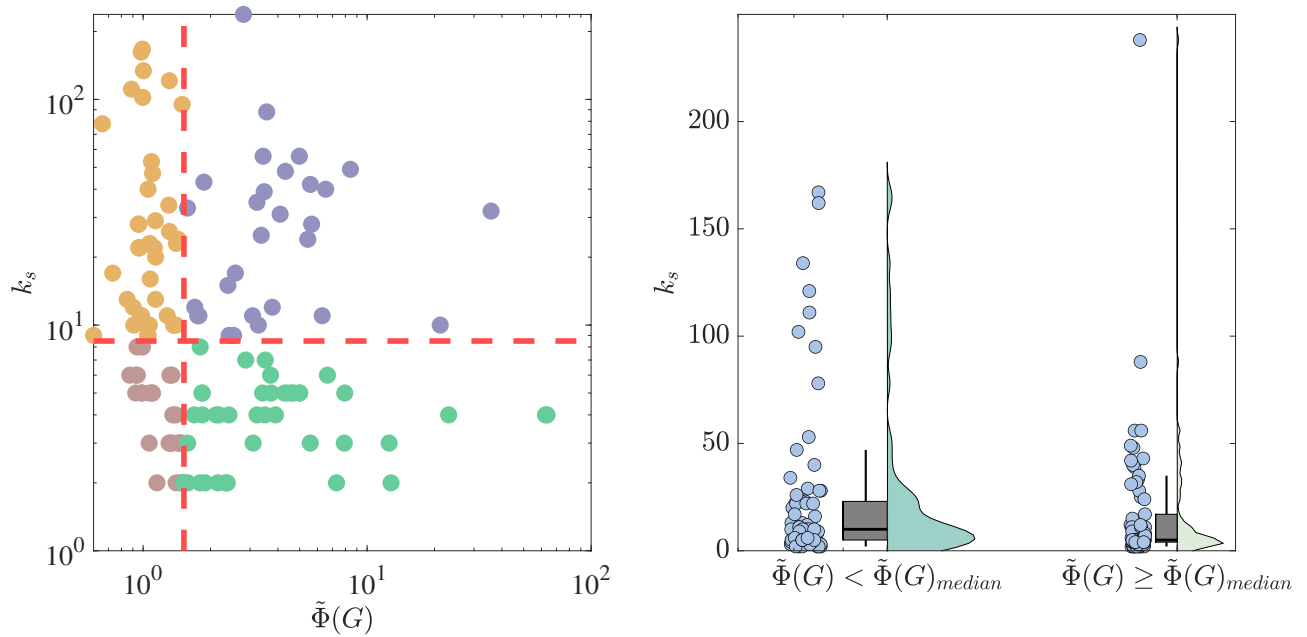

**Fig. S24. Correlation between relative path multiplicity and K shell in 140 real-world networks.** The metadata and results for all 140 networks are given in Supplementary Materials. **a**, The left part of each panel presents a scatter plot along with the Pearson correlation  $\rho$  between  $\tilde{\Phi}(G)$  and  $k_s$ . Each scatter plot is divided into four quadrants by the median values of  $\tilde{\Phi}(G)$  and  $k_s$  and the Quadrant Count Ratio (QCR) is also shown. The right-hand violin plots show the distribution, mean and median values of the corresponding  $k_s$ , which are divided into two parts based on the median value of RPMI. If there are more overlap between two violin subplots, it suggests a weaker correlation between the corresponding network metric and RPMI.
